# Supplementary material for: Nucleotide composition of transposable elements likely contributes to AT/GC compositional homogeneity of teleost fish genomes
Source: PubMed Central journal article supplement (PMC6909575; doi:10.1186/s13100-019-0195-y), 2019-12-12

## **Additional File 5**

**Fig. S3** Species specific comparisons of GC<sub>TE</sub> between Class I and Class II in following species:

*Takifugu flavidus*

*Takifugu rubripes*

*Danio rerio*

*Lepisosteus oculatus*

*Thunnus orientalis*

*Xiphophorus maculatus*

*Cynoglossus semilaevis*

*Anguilla anguilla*

*Ctenopharyngodon idellus*

*Astyanax mexicanus*

*Gadus morhua*

*Gasterosteus aculeatus*

*Oreochromis niloticus*

*Oryzias latipes*

*Scleropages formosus*

*Poecilia formosa*

*Branchiostoma belcheri*

*Petromyzon marinus*

*Callorhinchus mili*

*Takifugu  
flavidus*

$GC_G = 45,6\%$

**Class I**

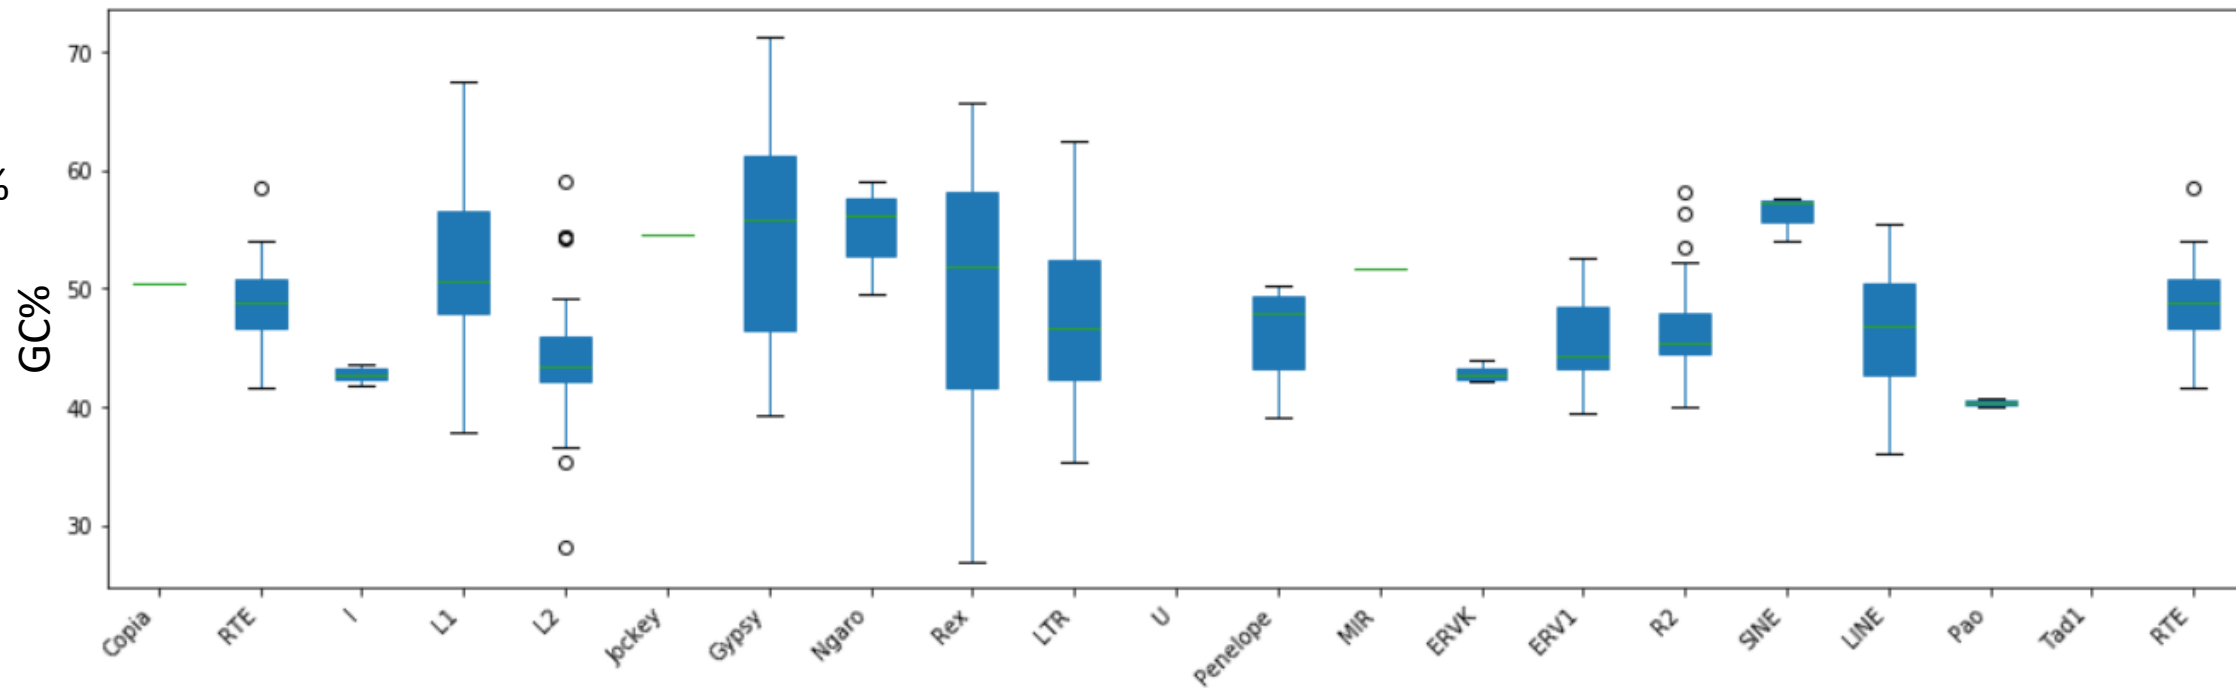

**Class II**

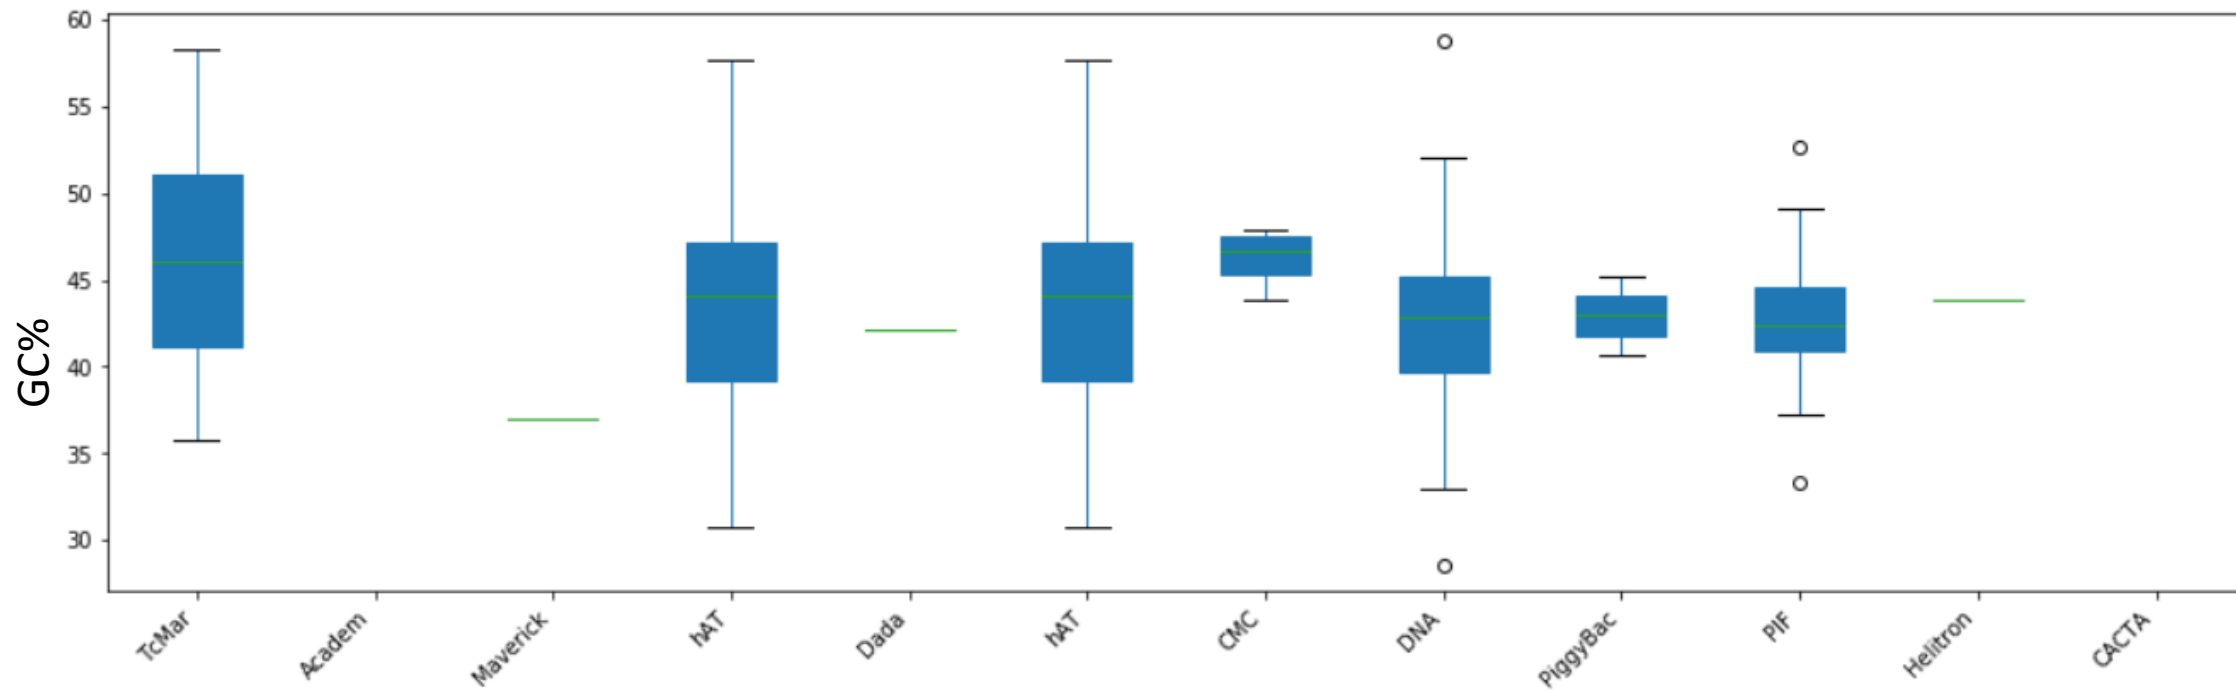

*Takifugu  
rubripes*

$GC_G = 45,7\%$

**Class I**

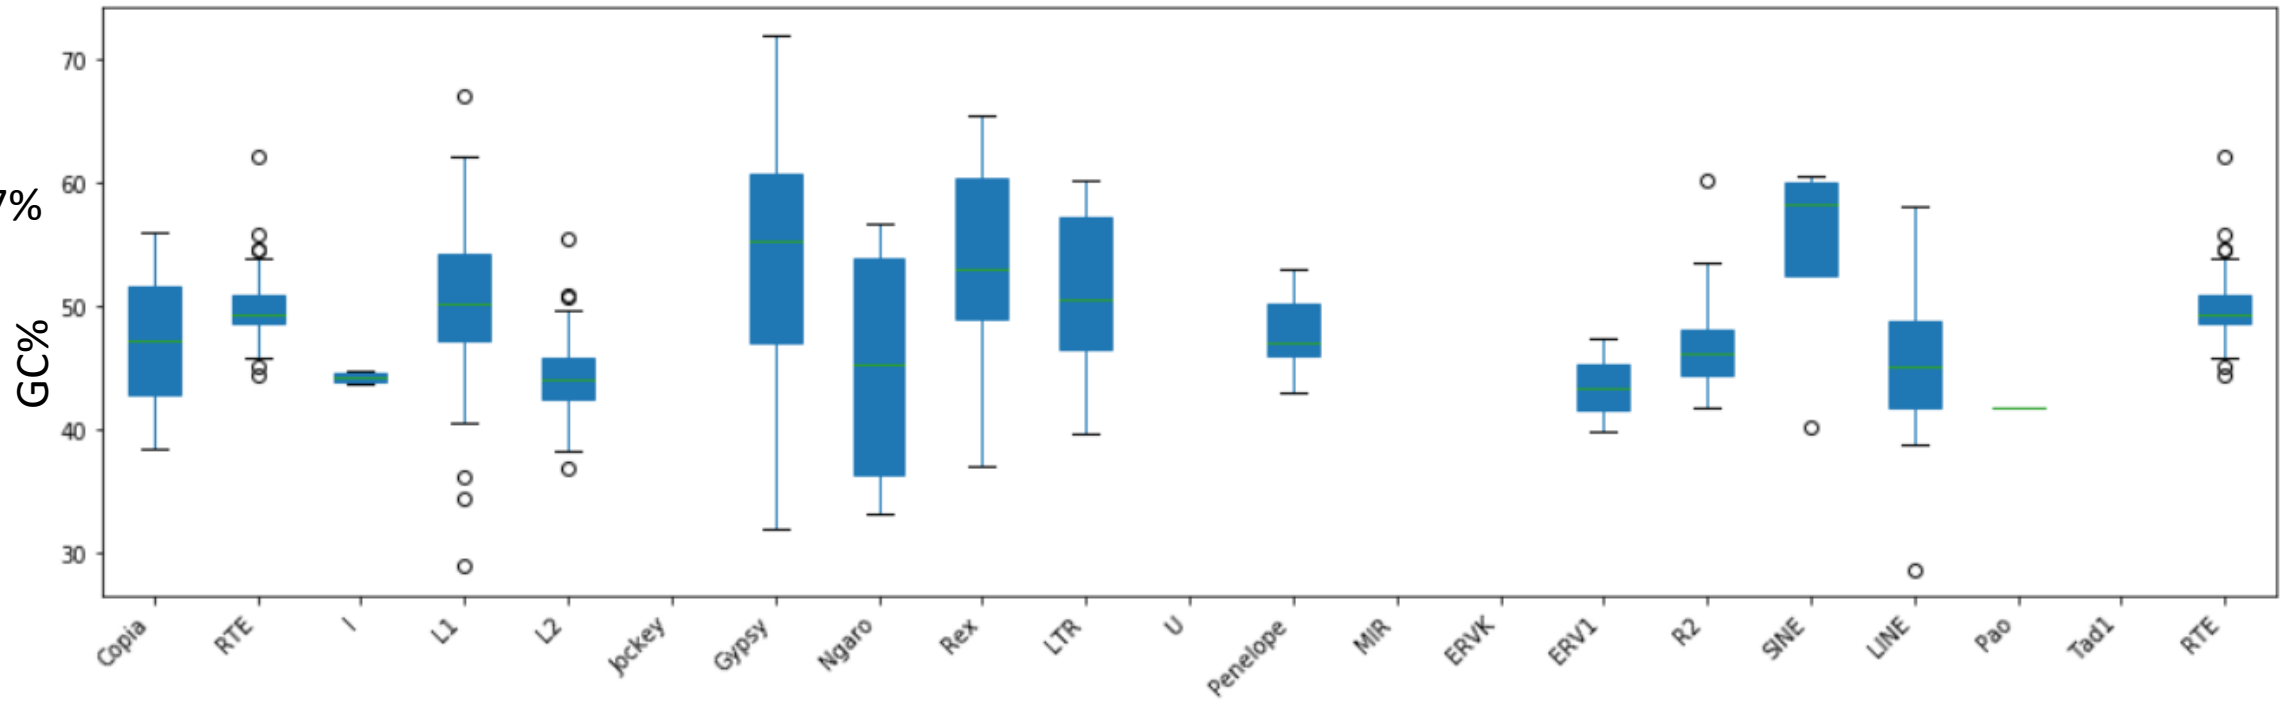

**Class II**

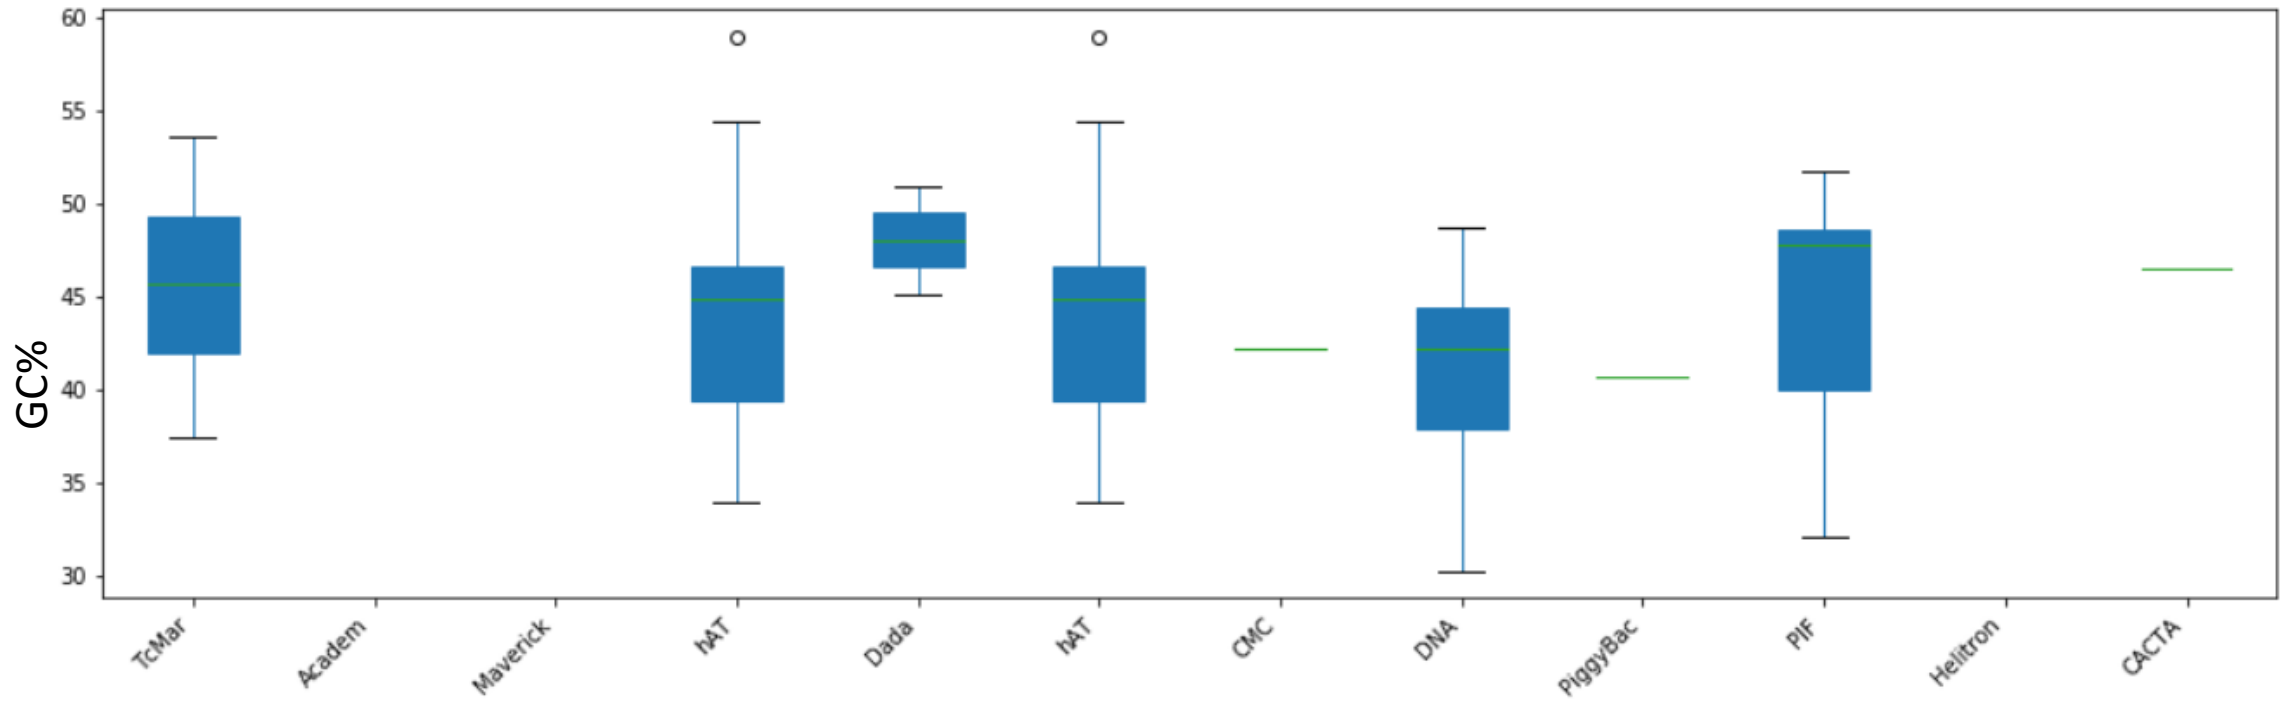

*Danio rerio*

$GC_G = 36,7\%$

**Class I**

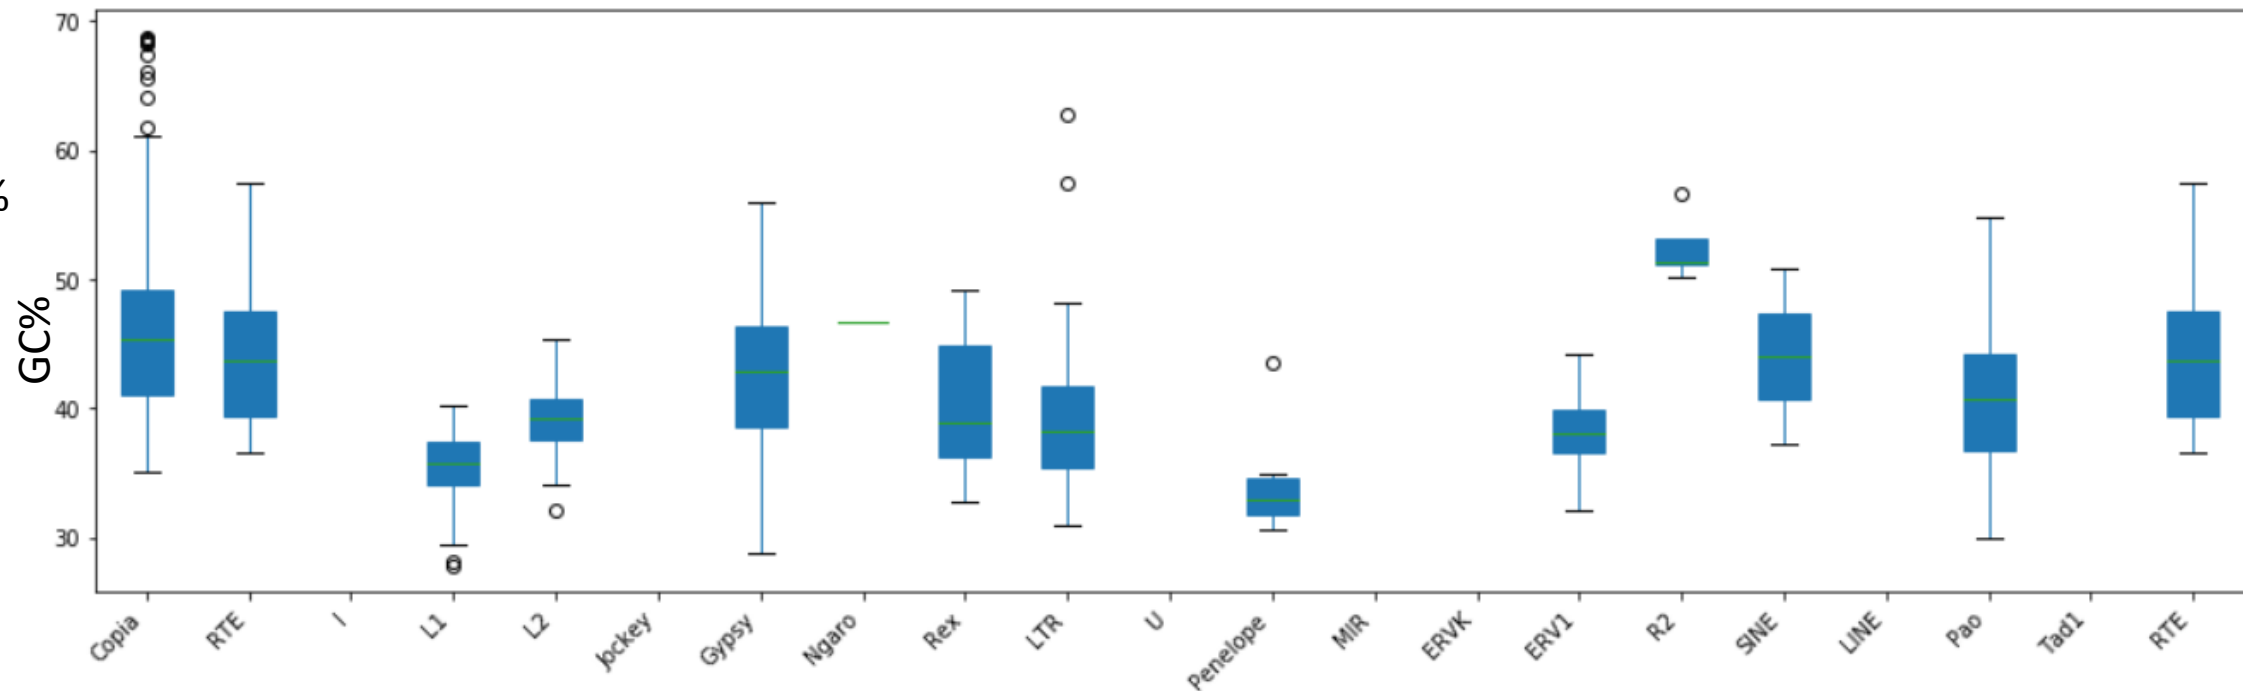

**Class II**

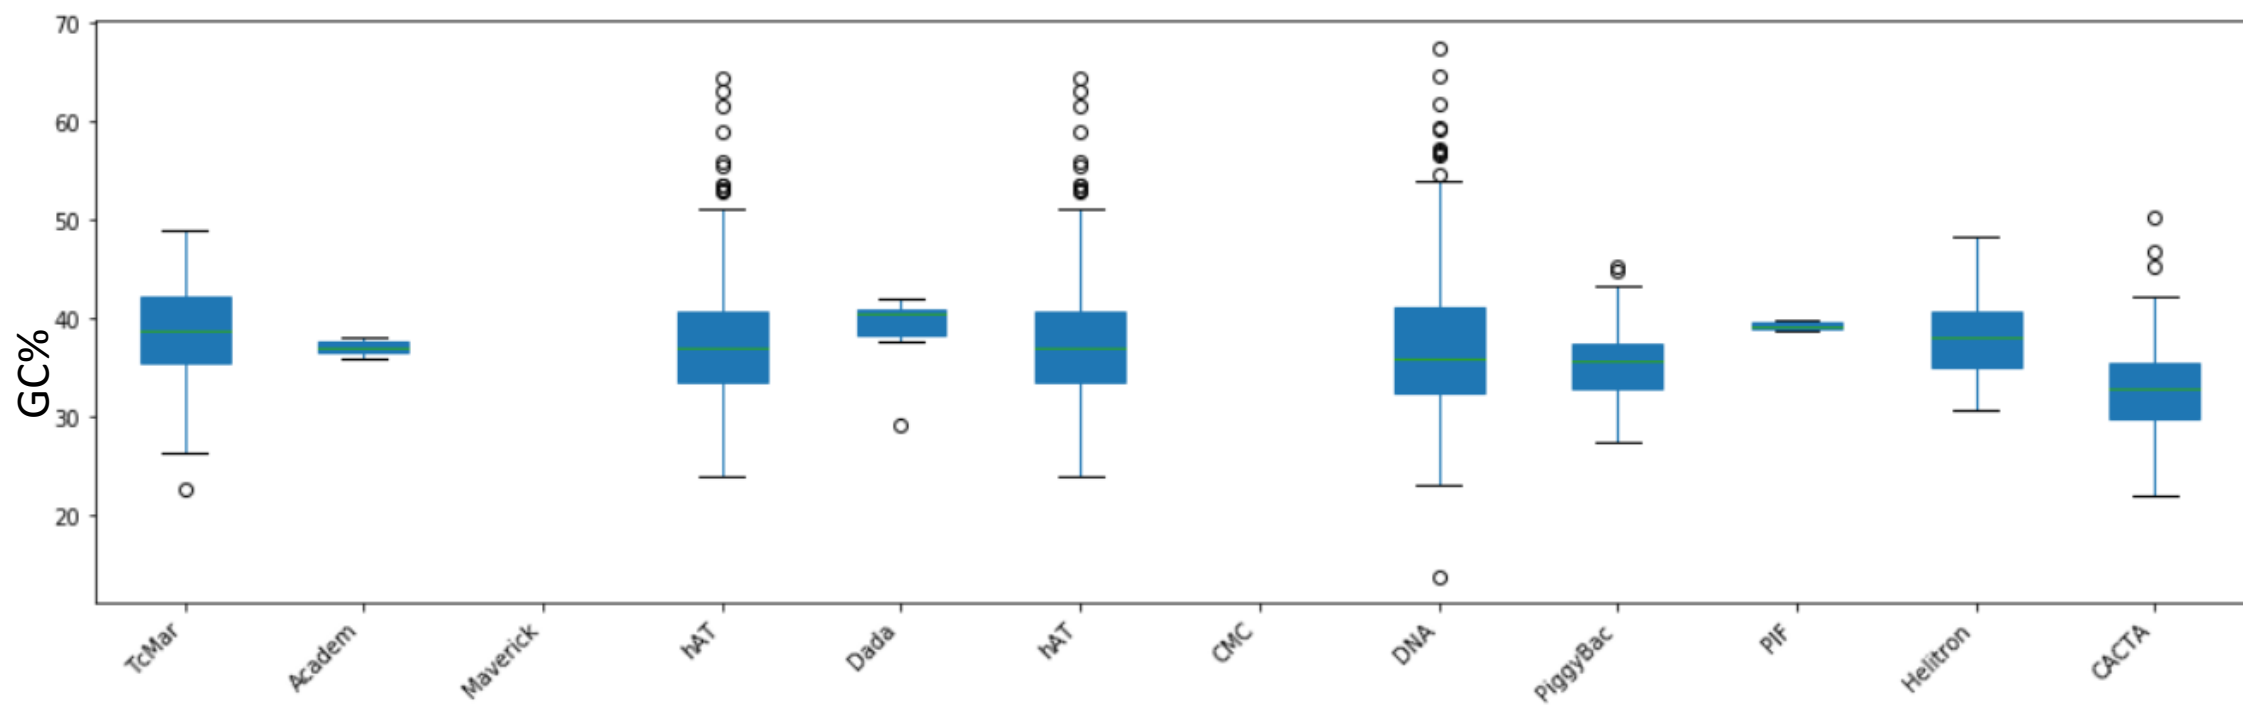

*Lepisosteus  
oculatus*

GC<sub>G</sub> = 40,4%

**Class I**

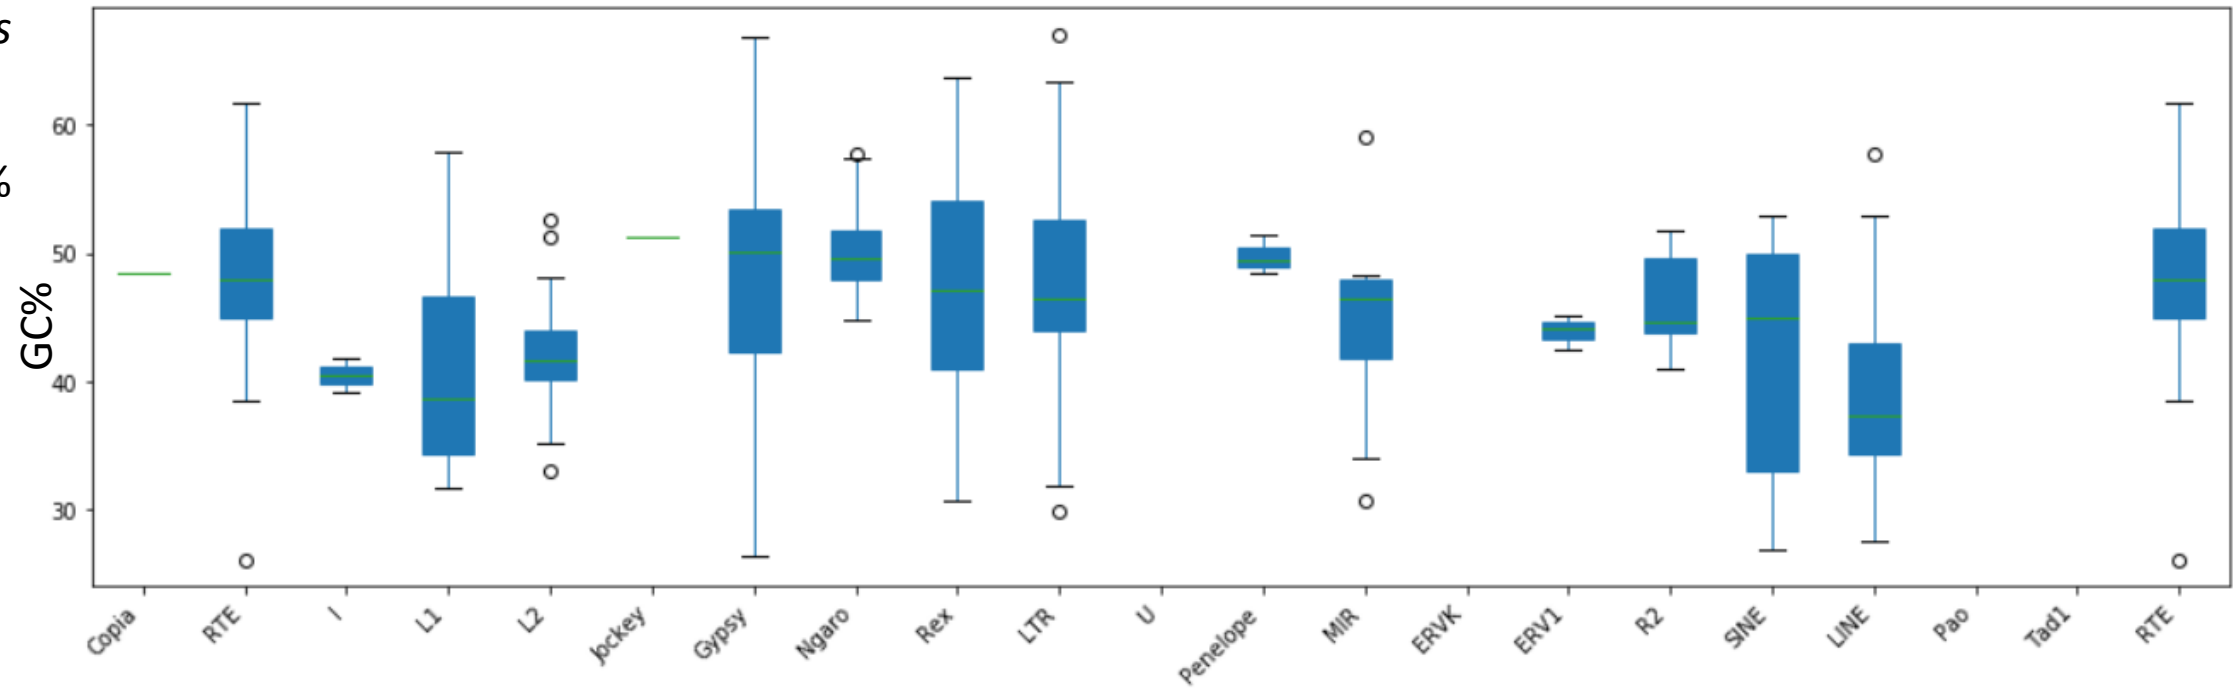

**Class II**

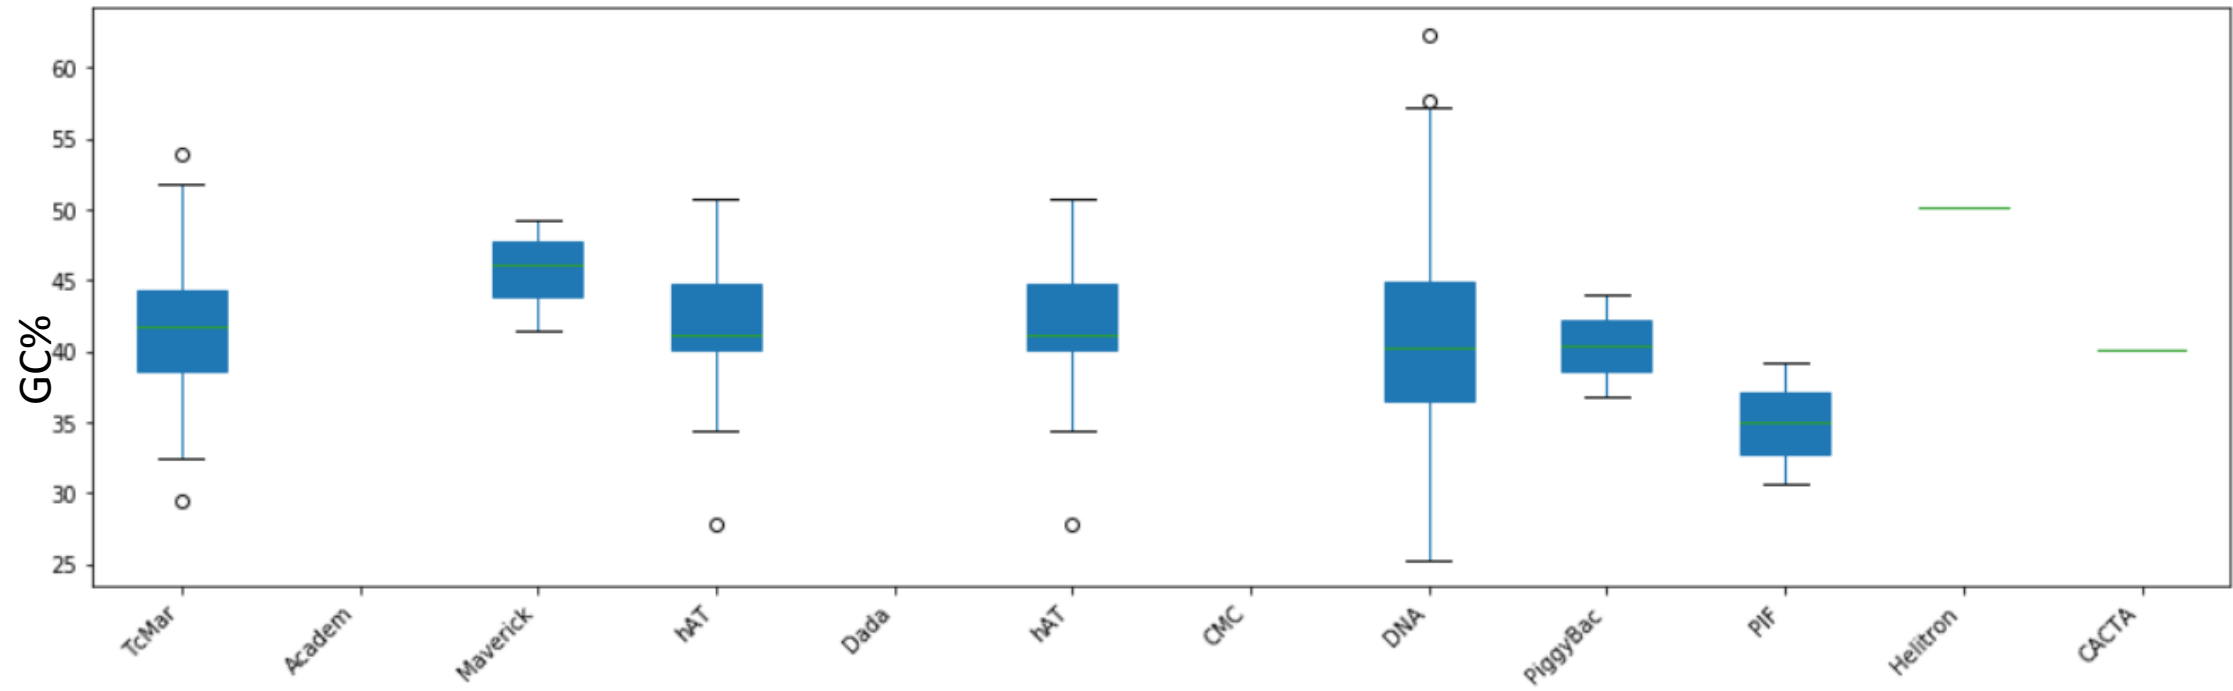

*Thunnus orientalis*

GC<sub>G</sub> = 39,6%

**Class I**

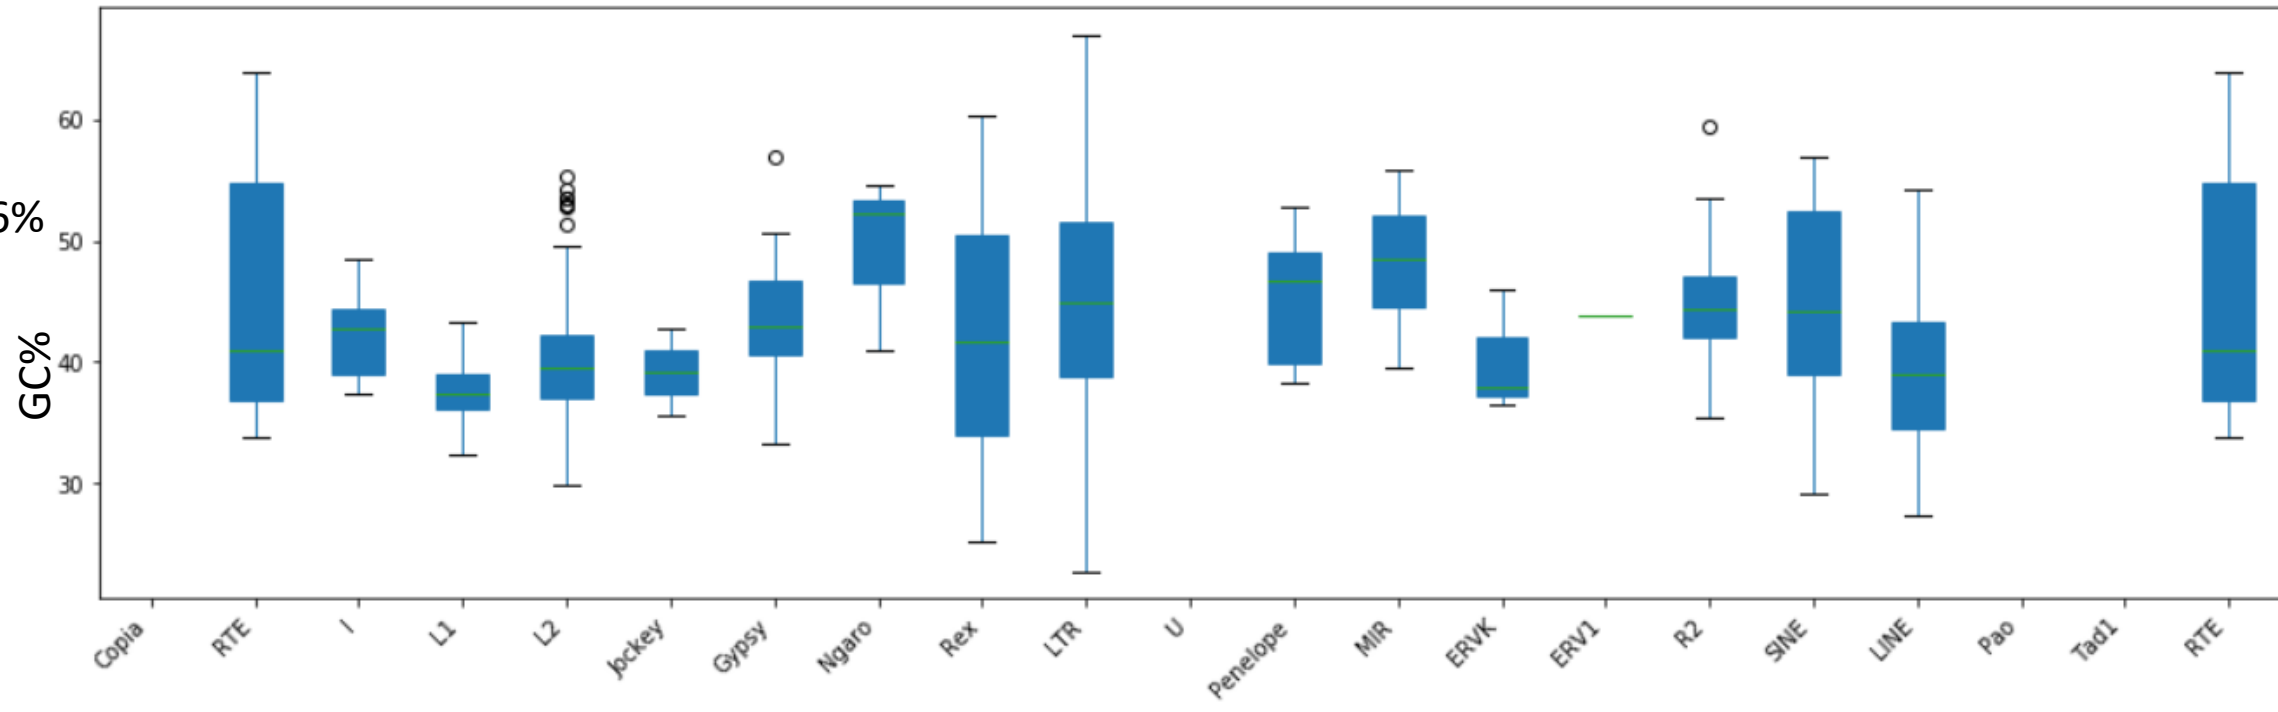

**Class II**

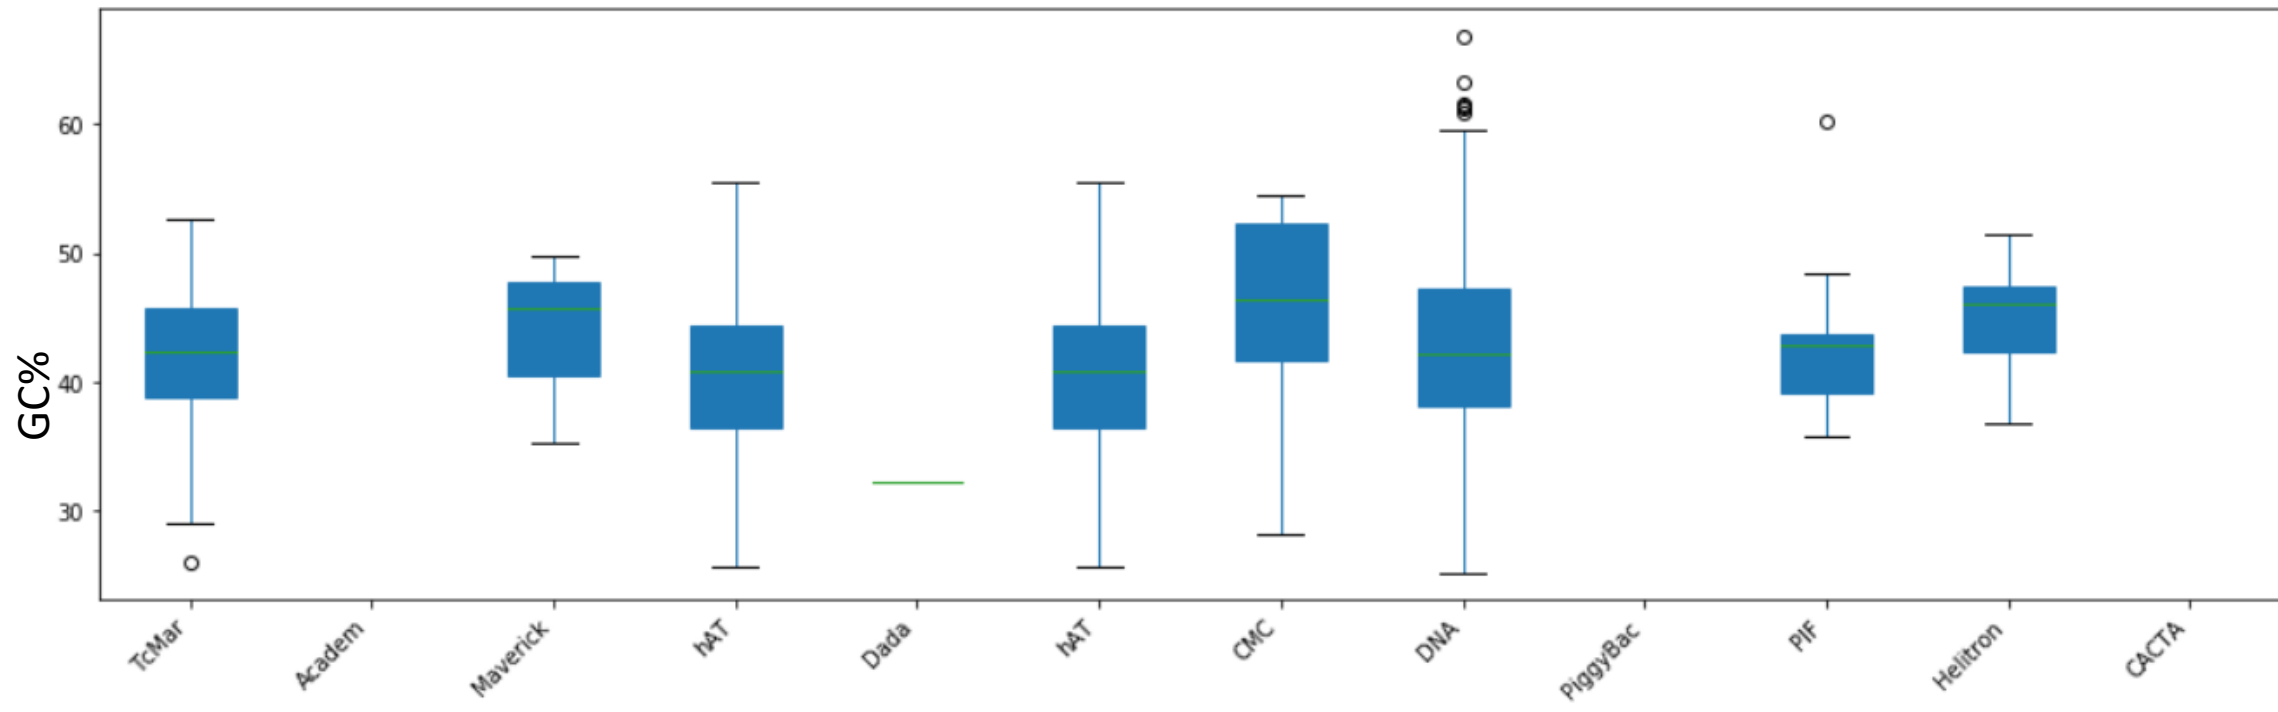

*Xiphophorus maculatus*

GC<sub>G</sub> = 39,4%

**Class I**

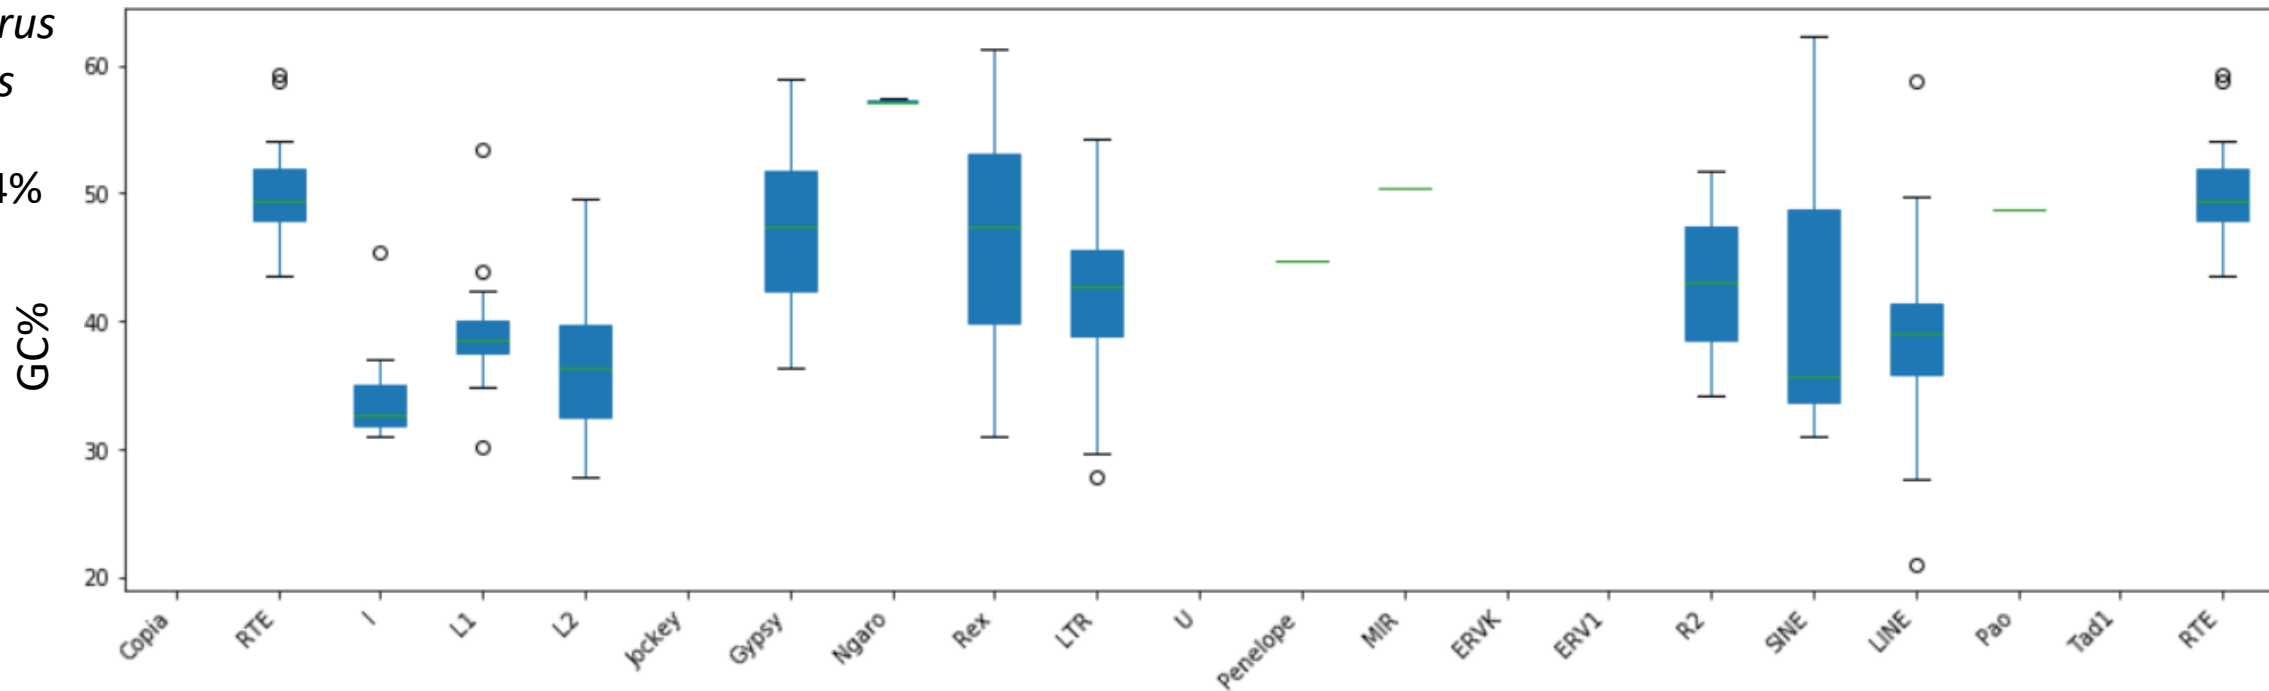

**Class II**

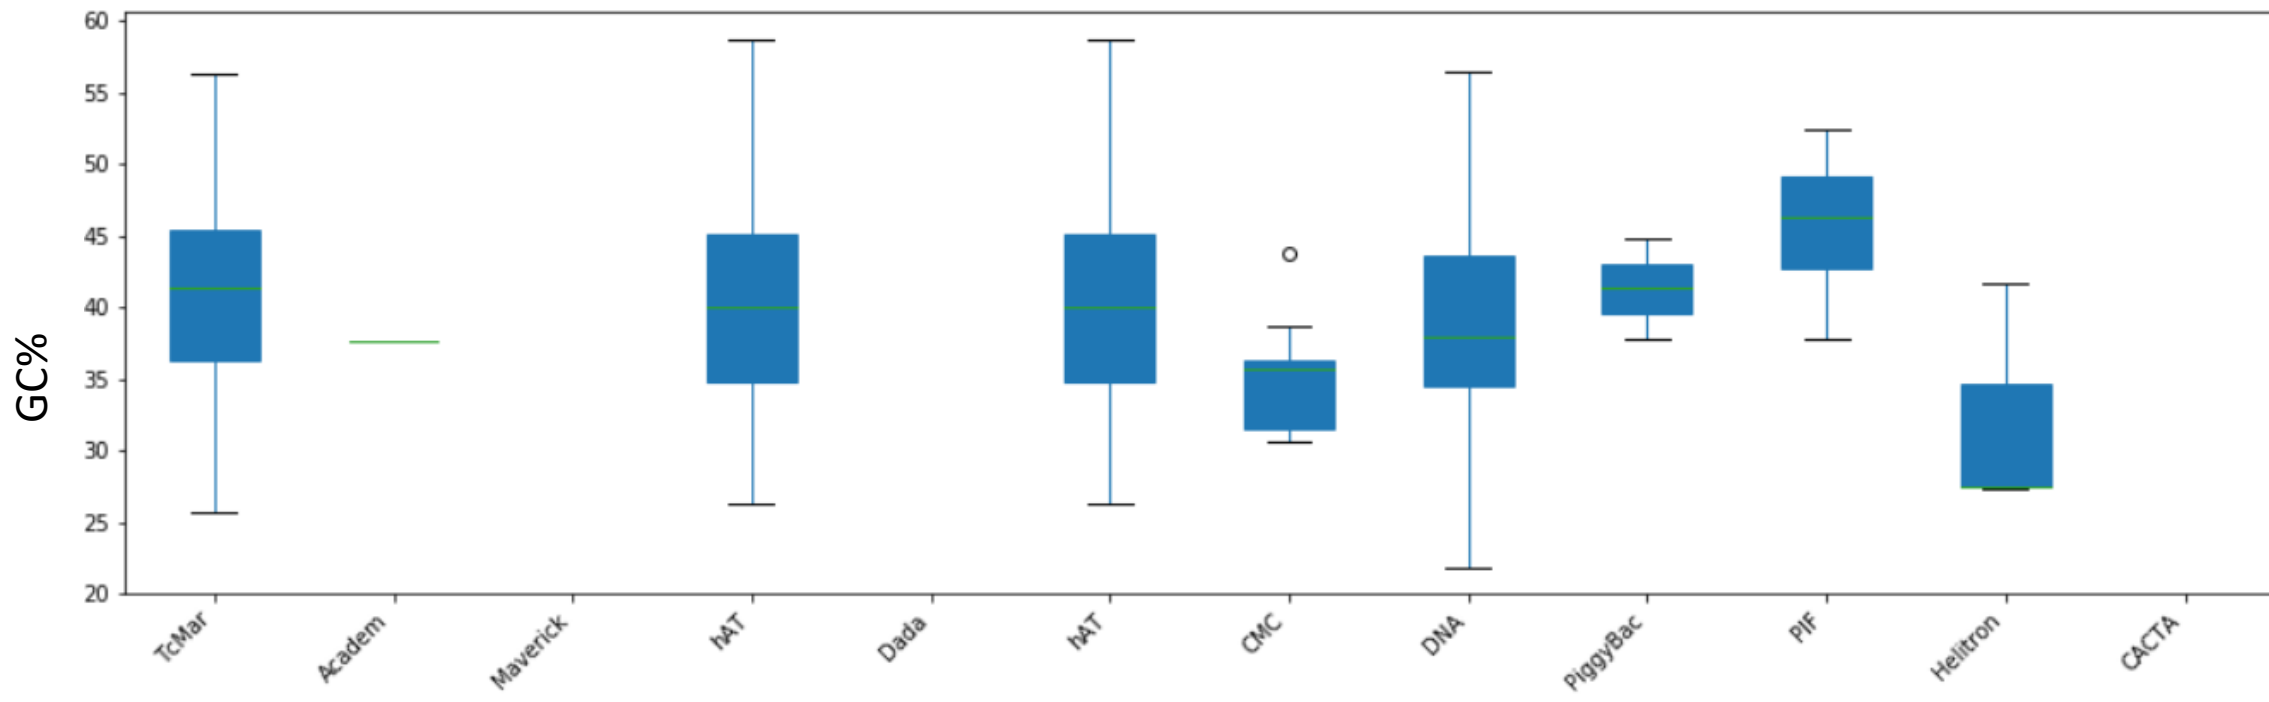

*Cynoglossus semilaevis*

GC<sub>G</sub> = 41,3%

**Class I**

GC%

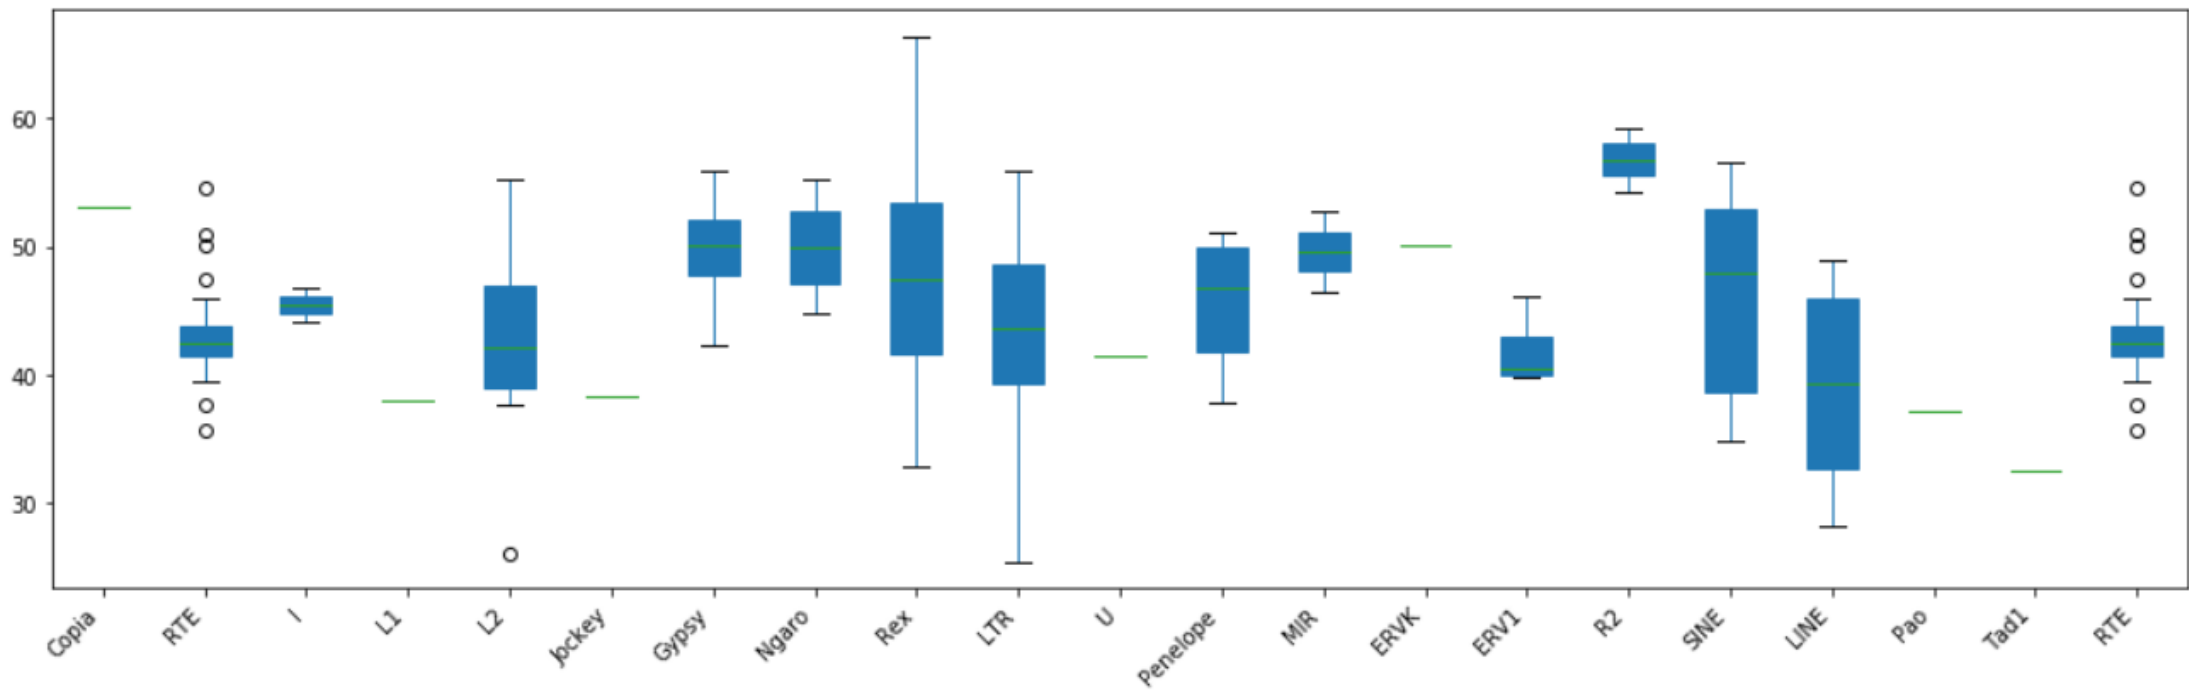

**Class II**

GC%

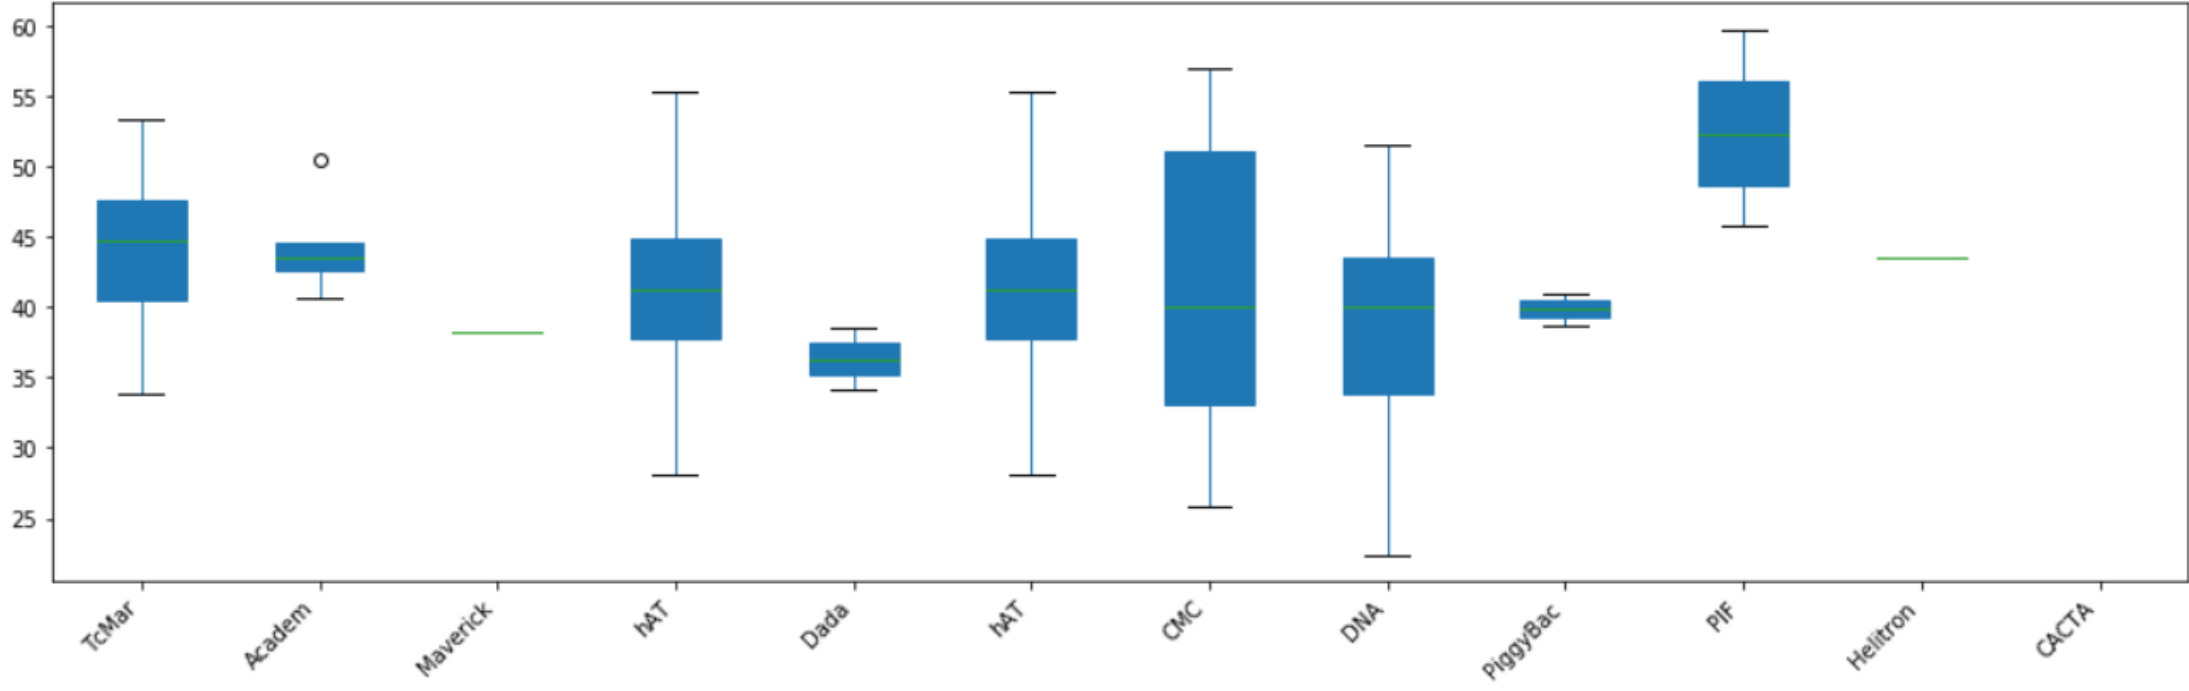



*Anguilla  
anguilla*

GC<sub>G</sub> = 42,9%

**Class I**

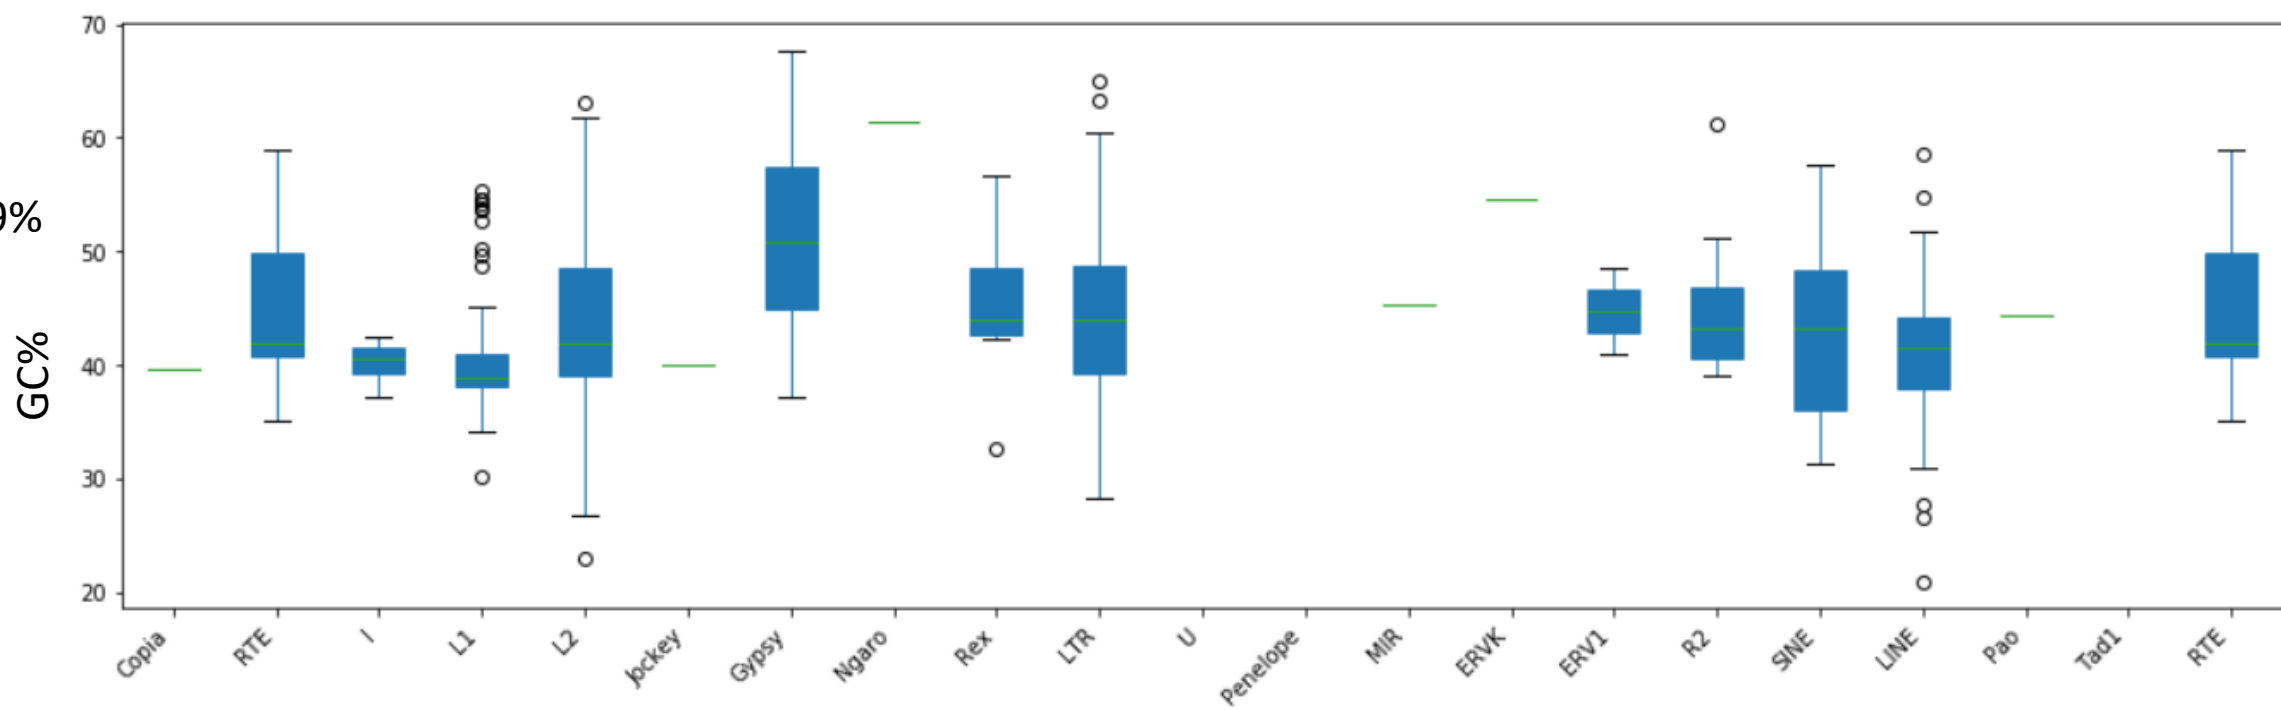

**Class II**

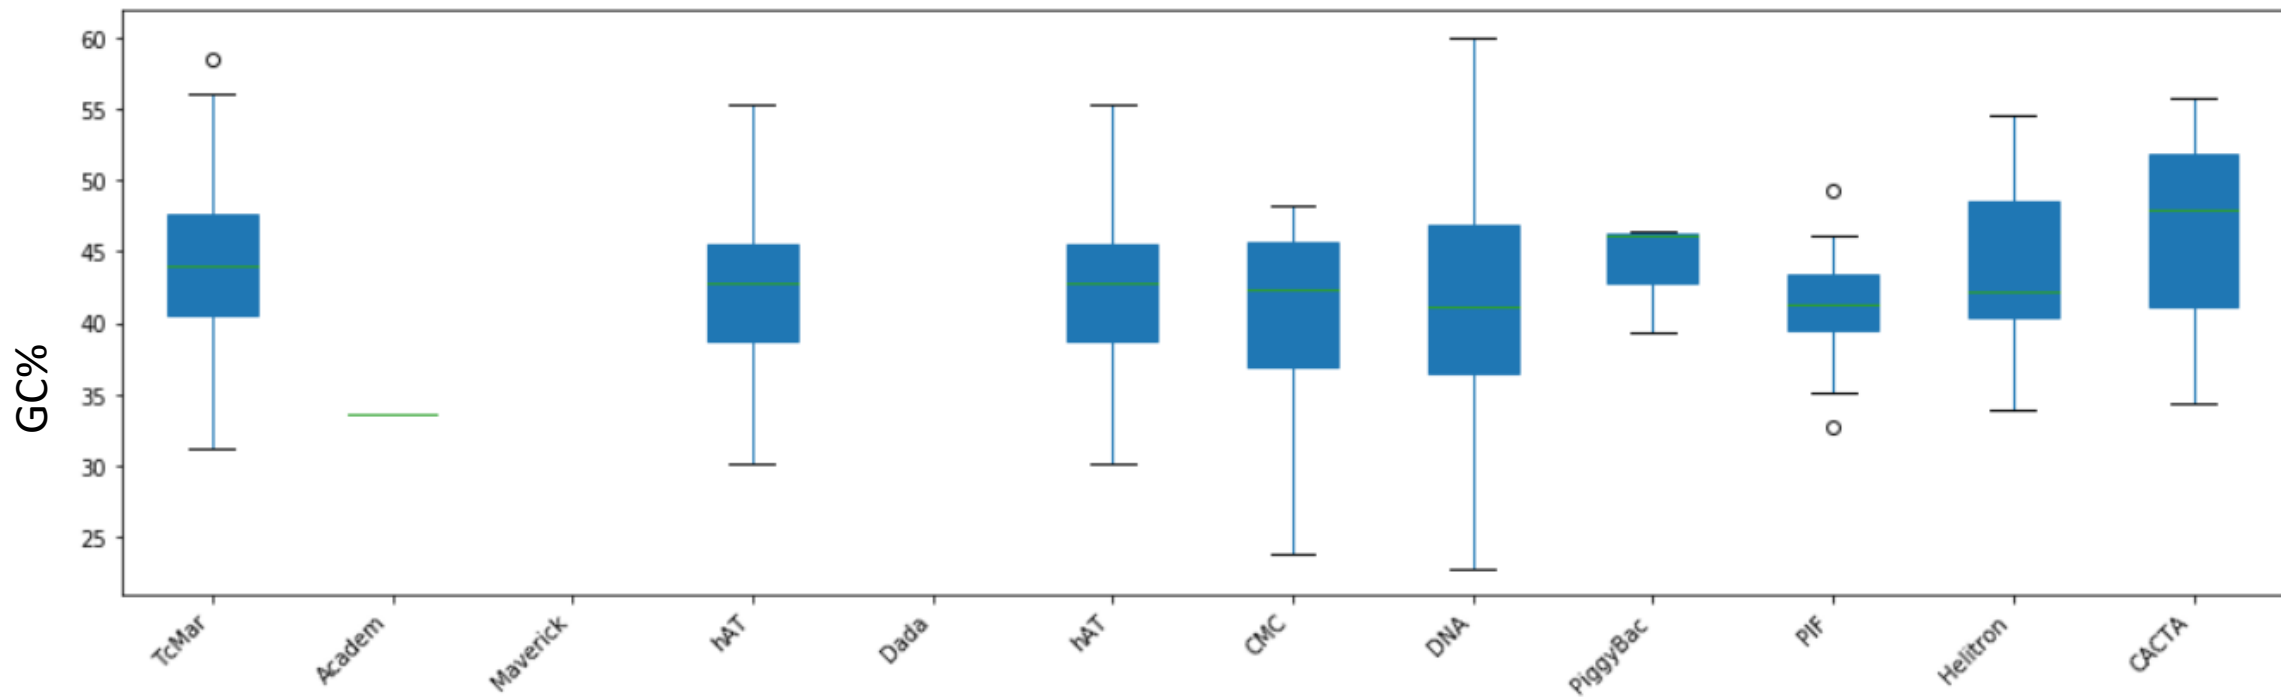

*Ctenopharyngodon  
idellus*

GC<sub>G</sub> = 37,4%

**Class I**

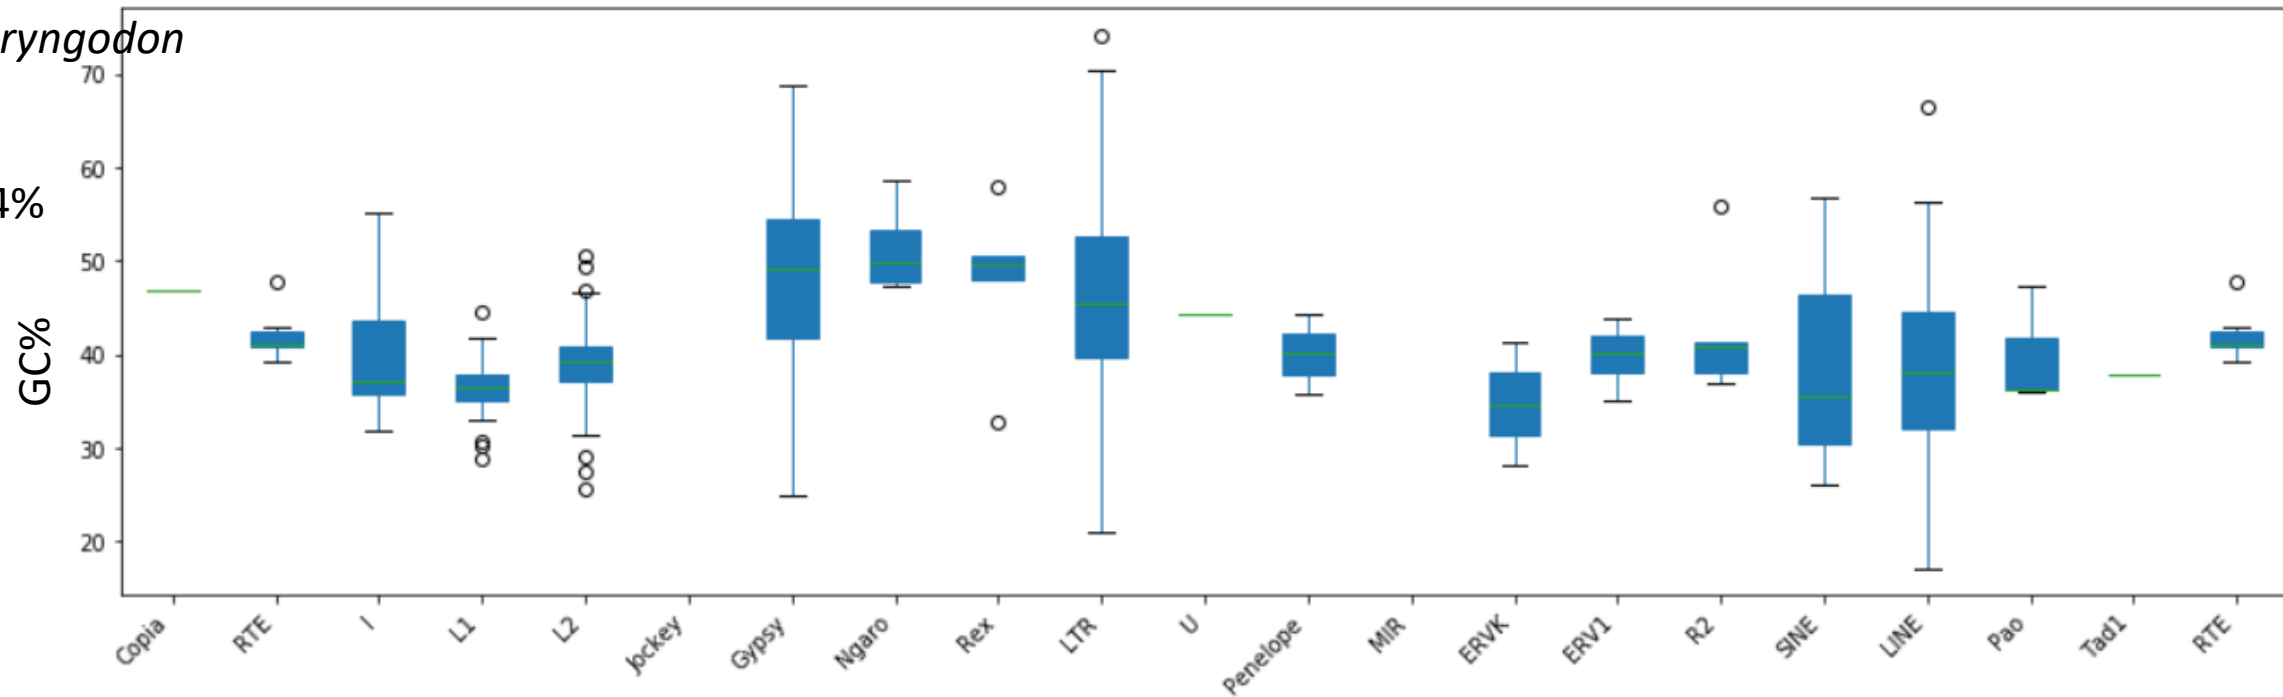

**Class II**

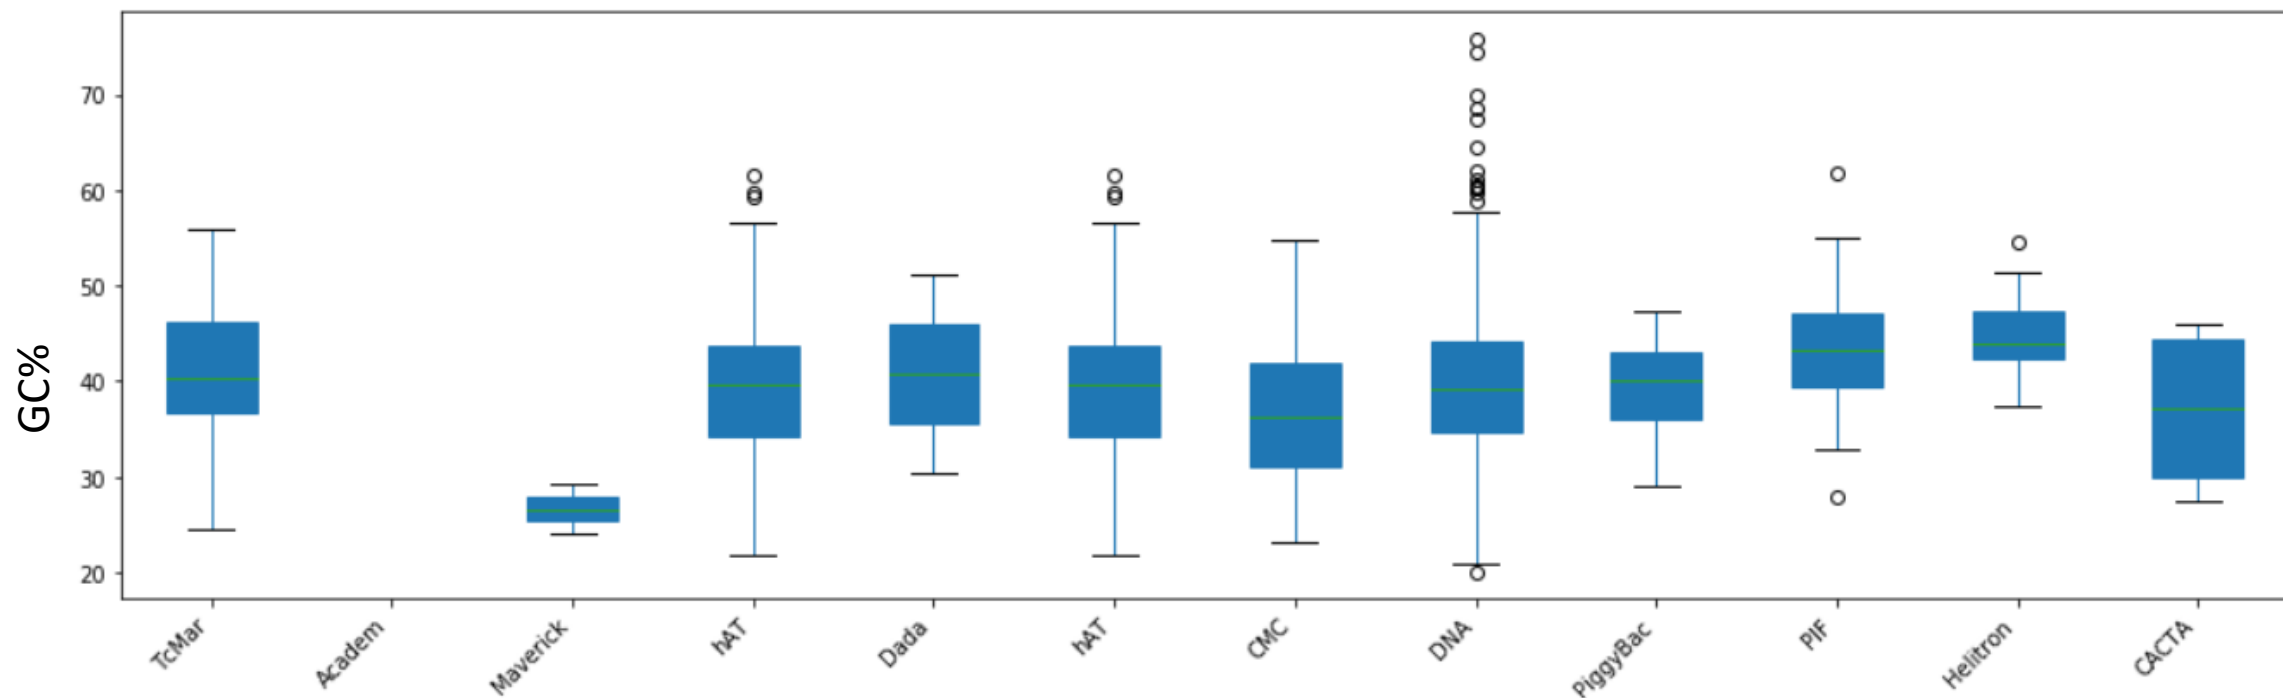

*Astyanax  
mexicanus*

GC<sub>G</sub> = 38,4%

**Class I**

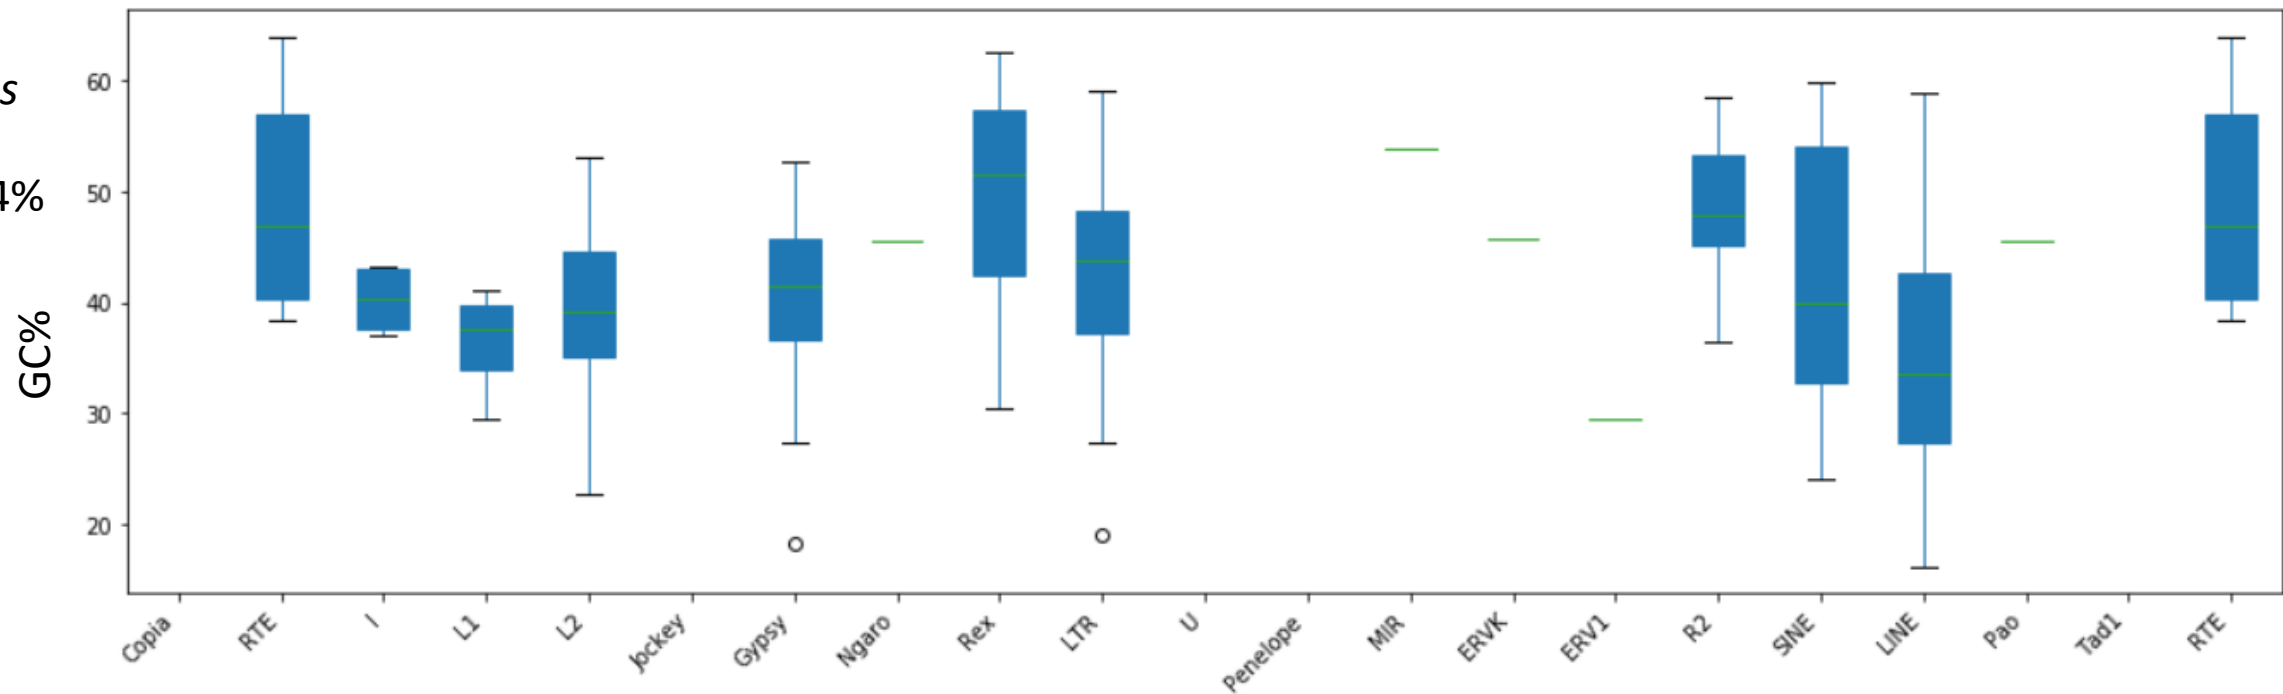

**Class II**

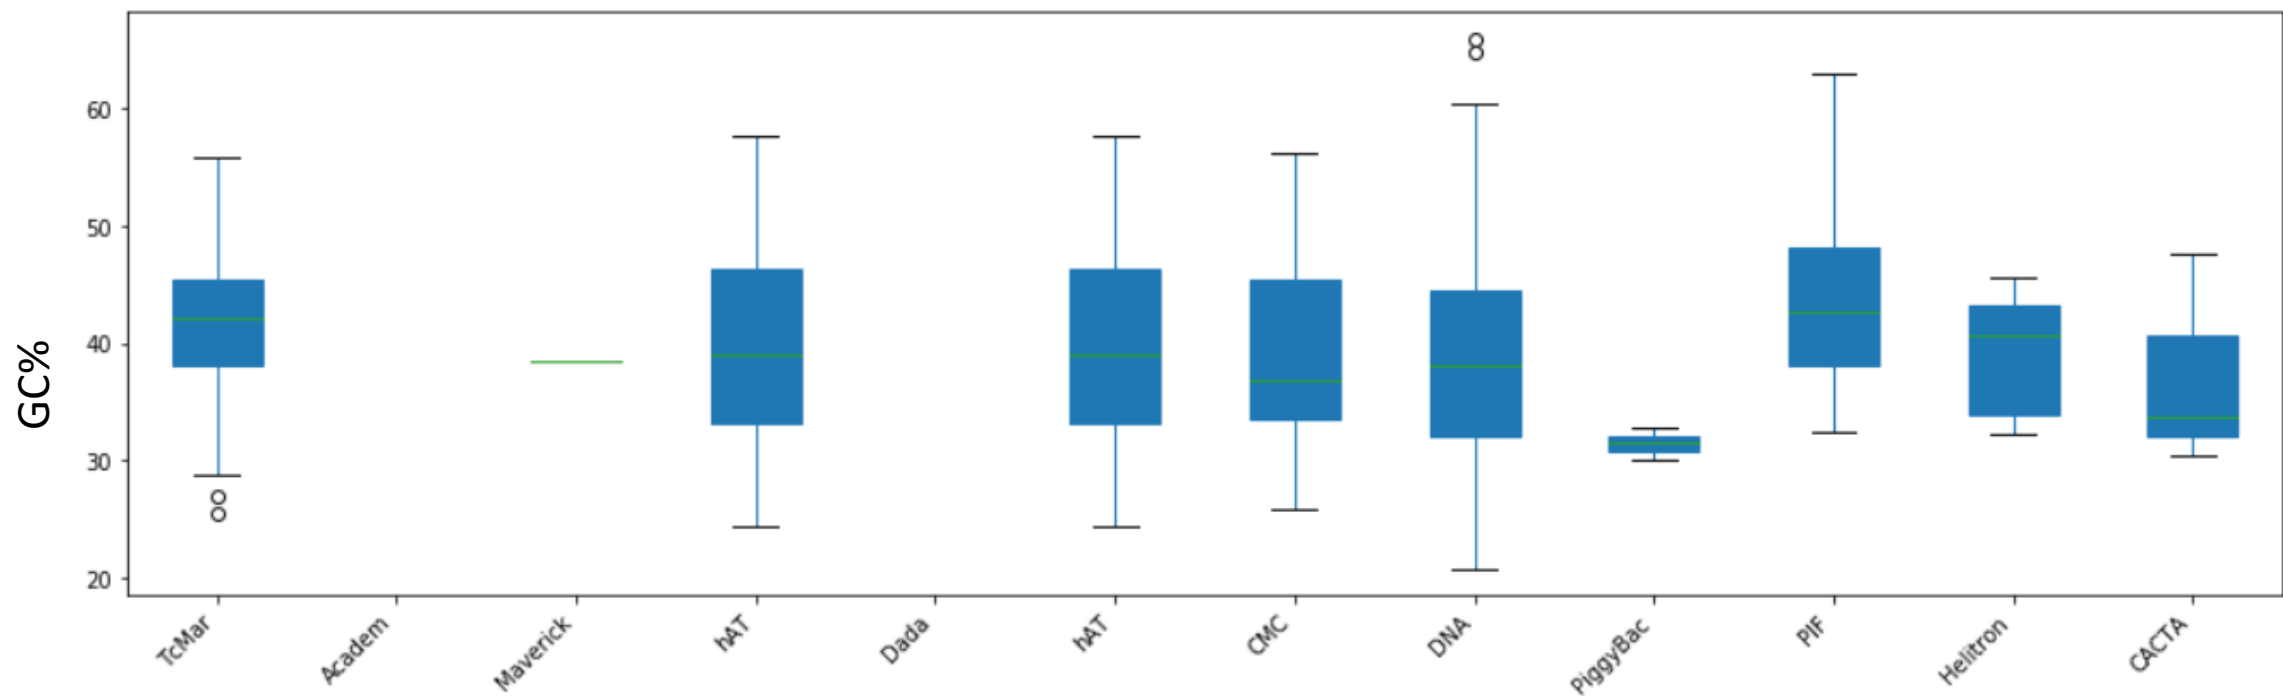

*Gadus morhua*

GC<sub>G</sub> = 46,3%

**Class I**

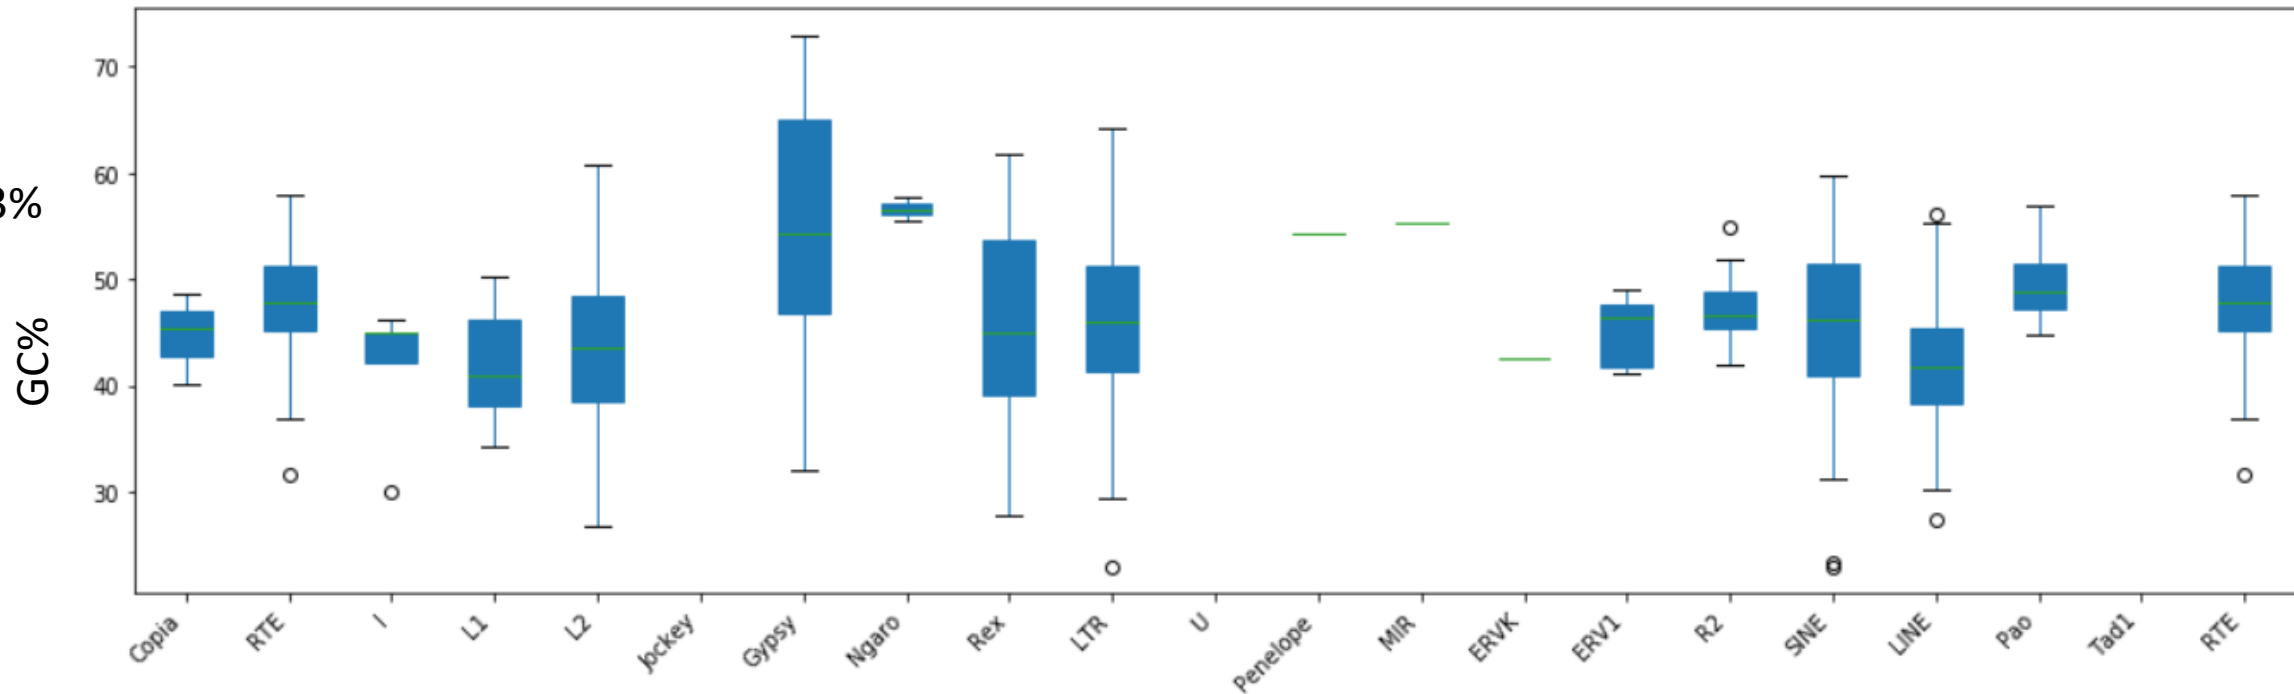

**Class II**

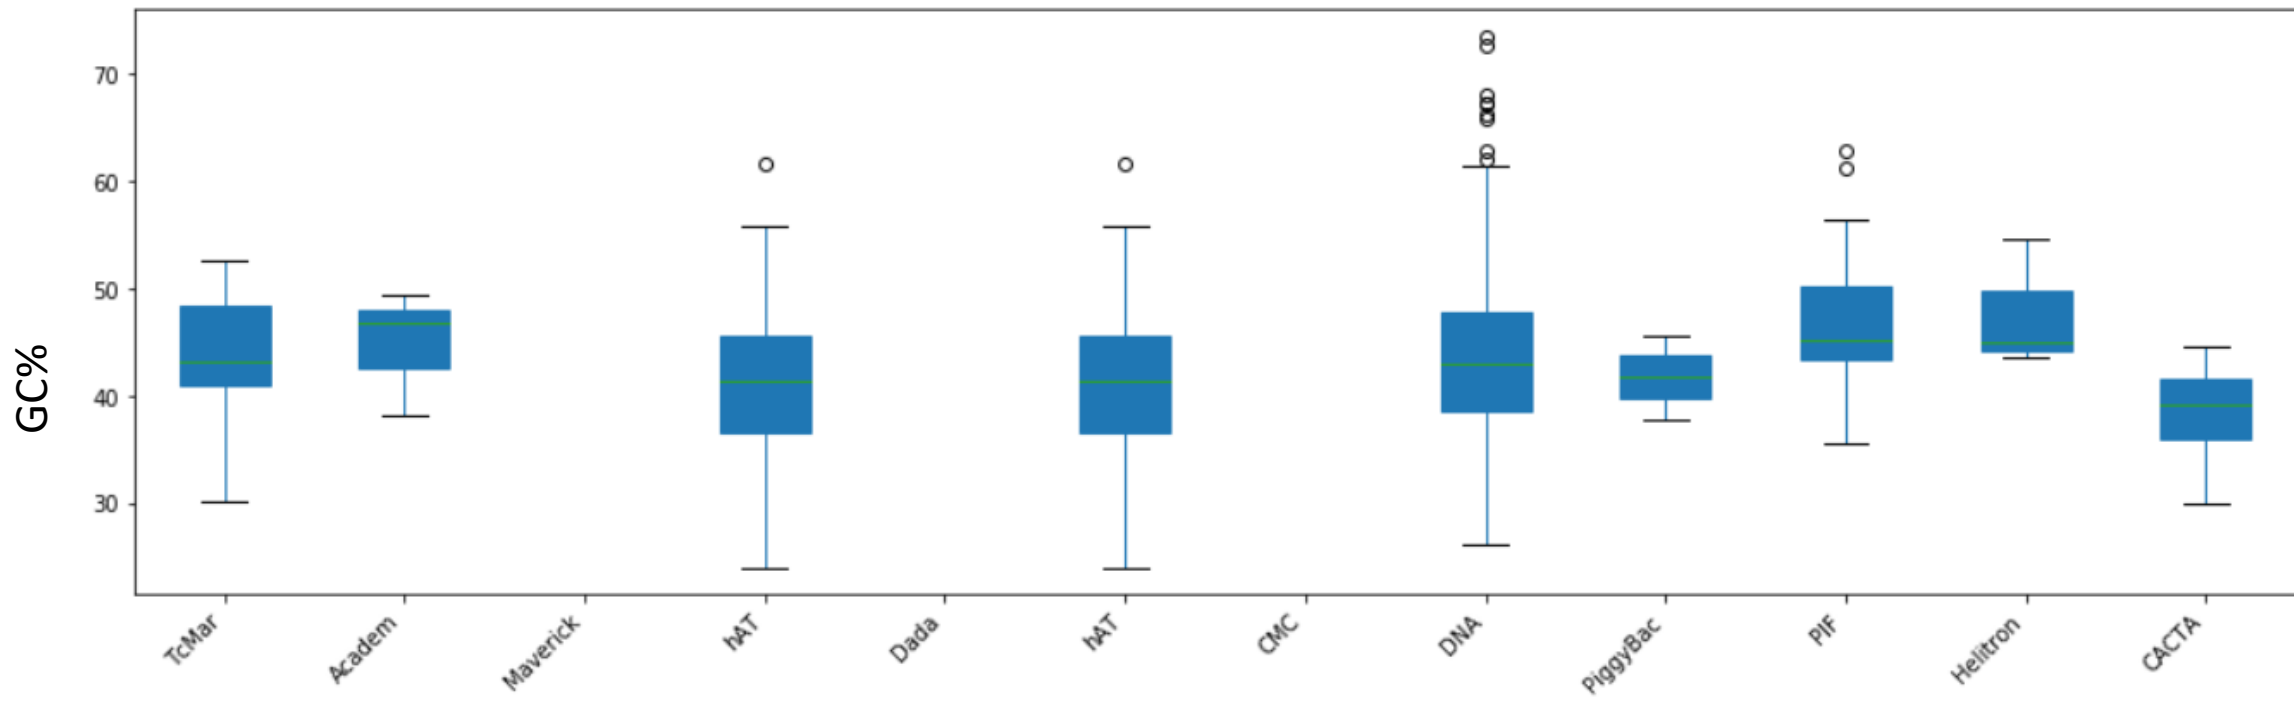

*Gasterosteus aculeatus*

GC<sub>G</sub> = 44,6%

**Class I**

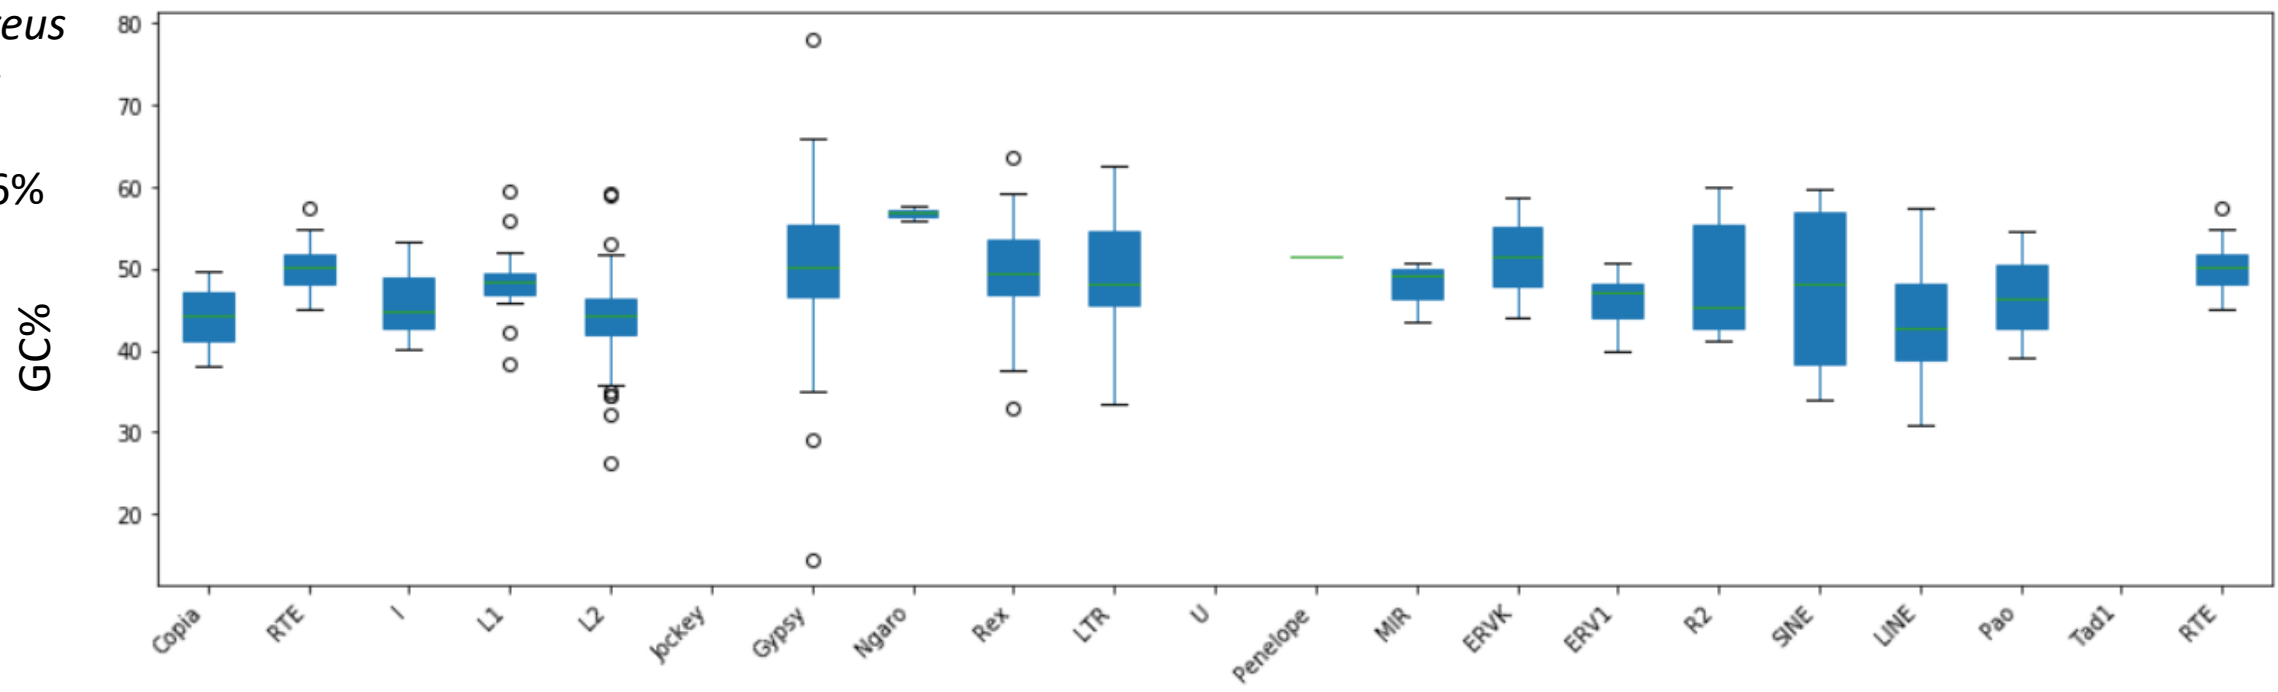

**Class II**

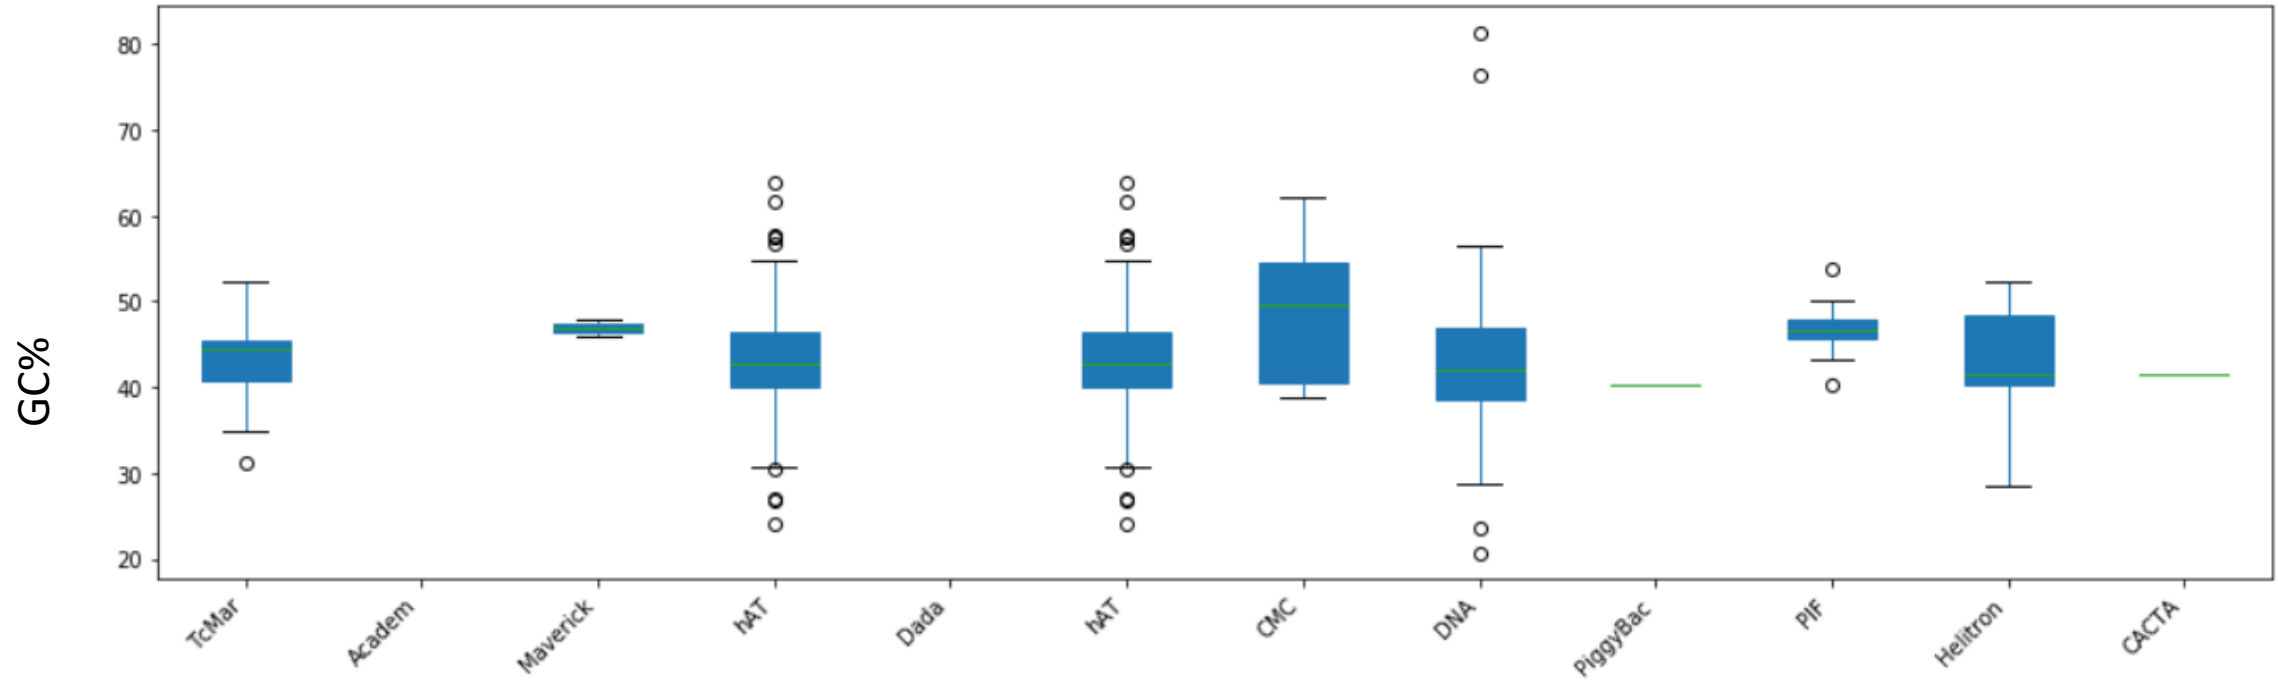

*Oreochromis niloticus*

GC<sub>G</sub> = 39,9%

**Class I**

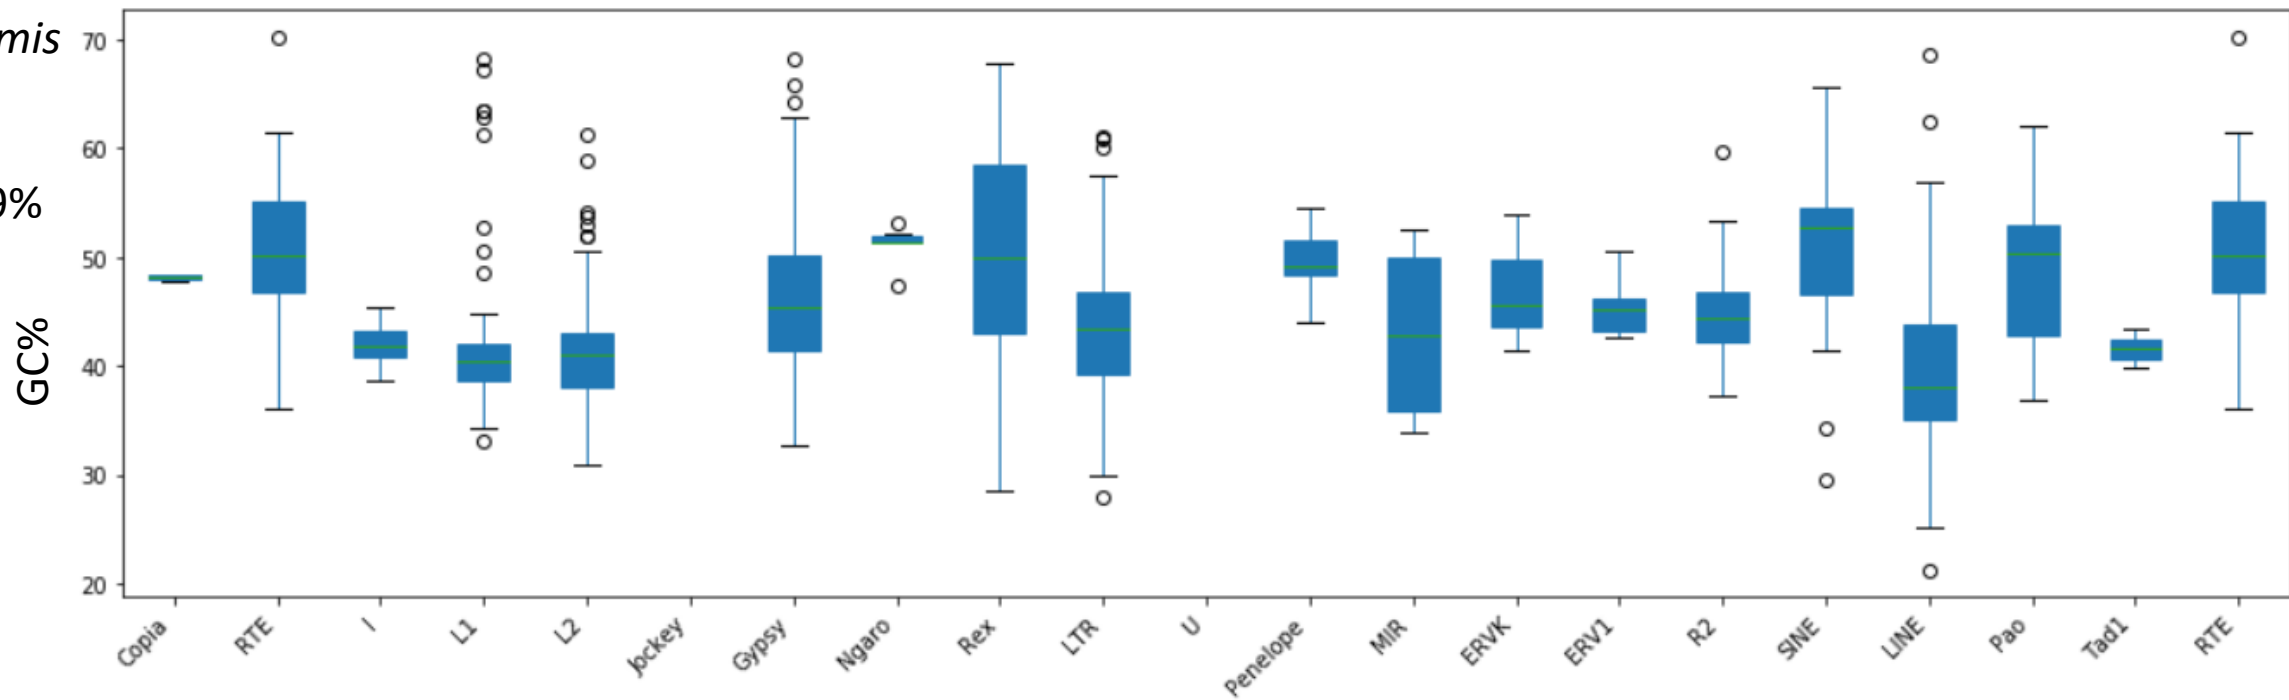

**Class II**

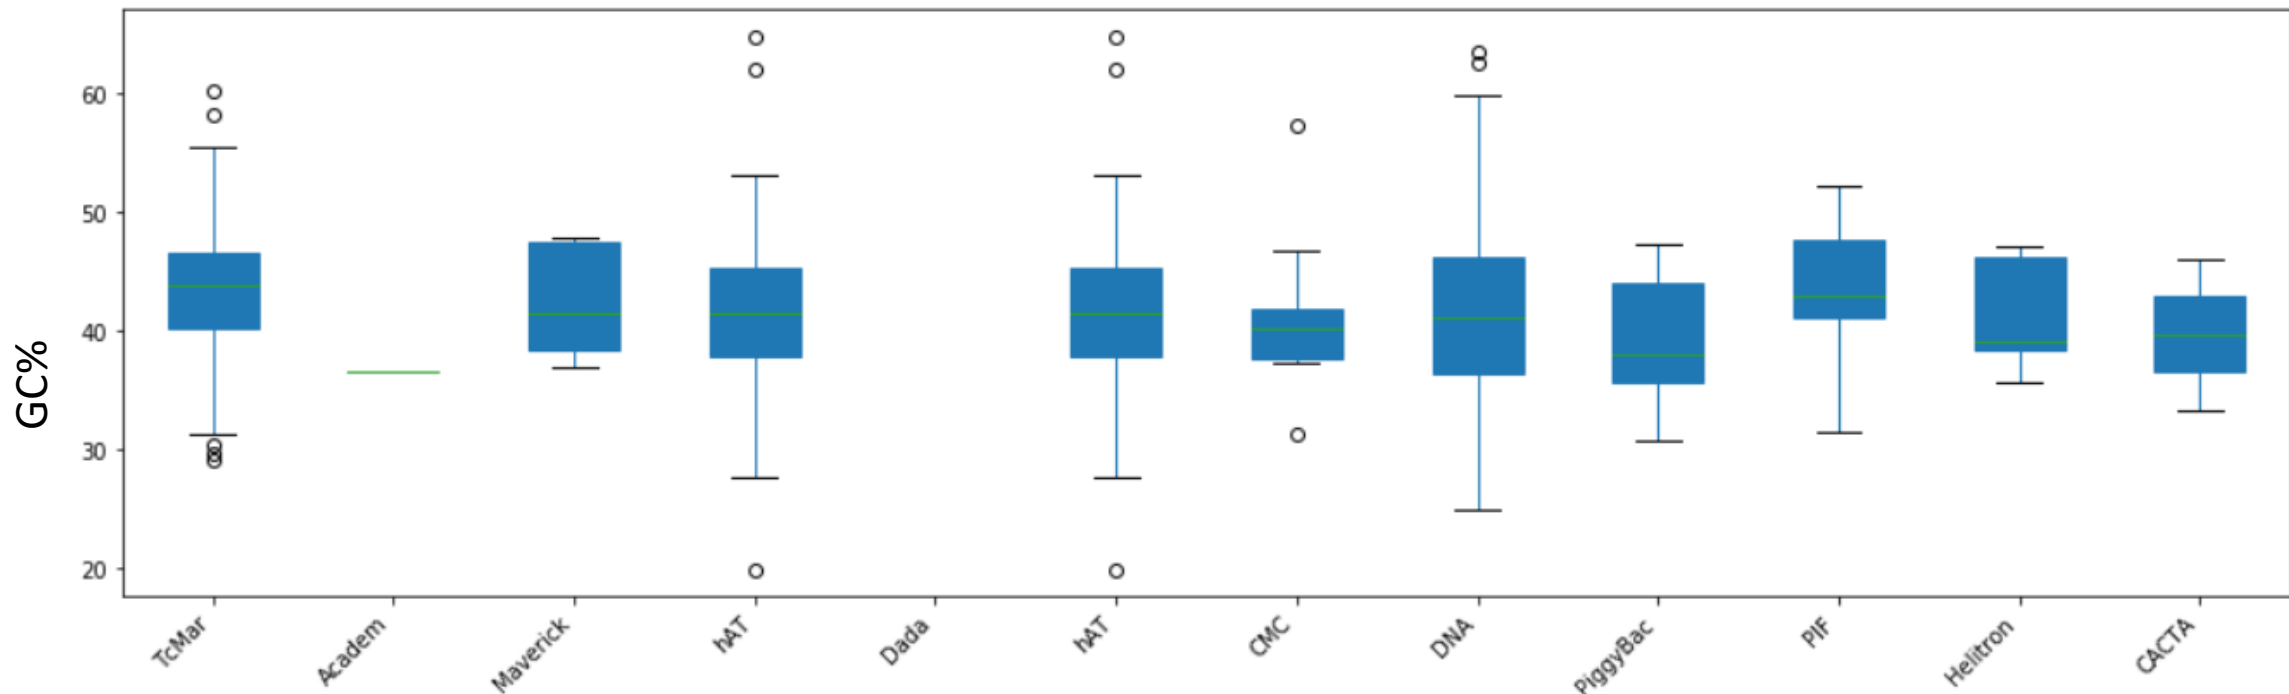

*Oryzias latipes*

GC<sub>G</sub> = 41,5%

Class I

GC%

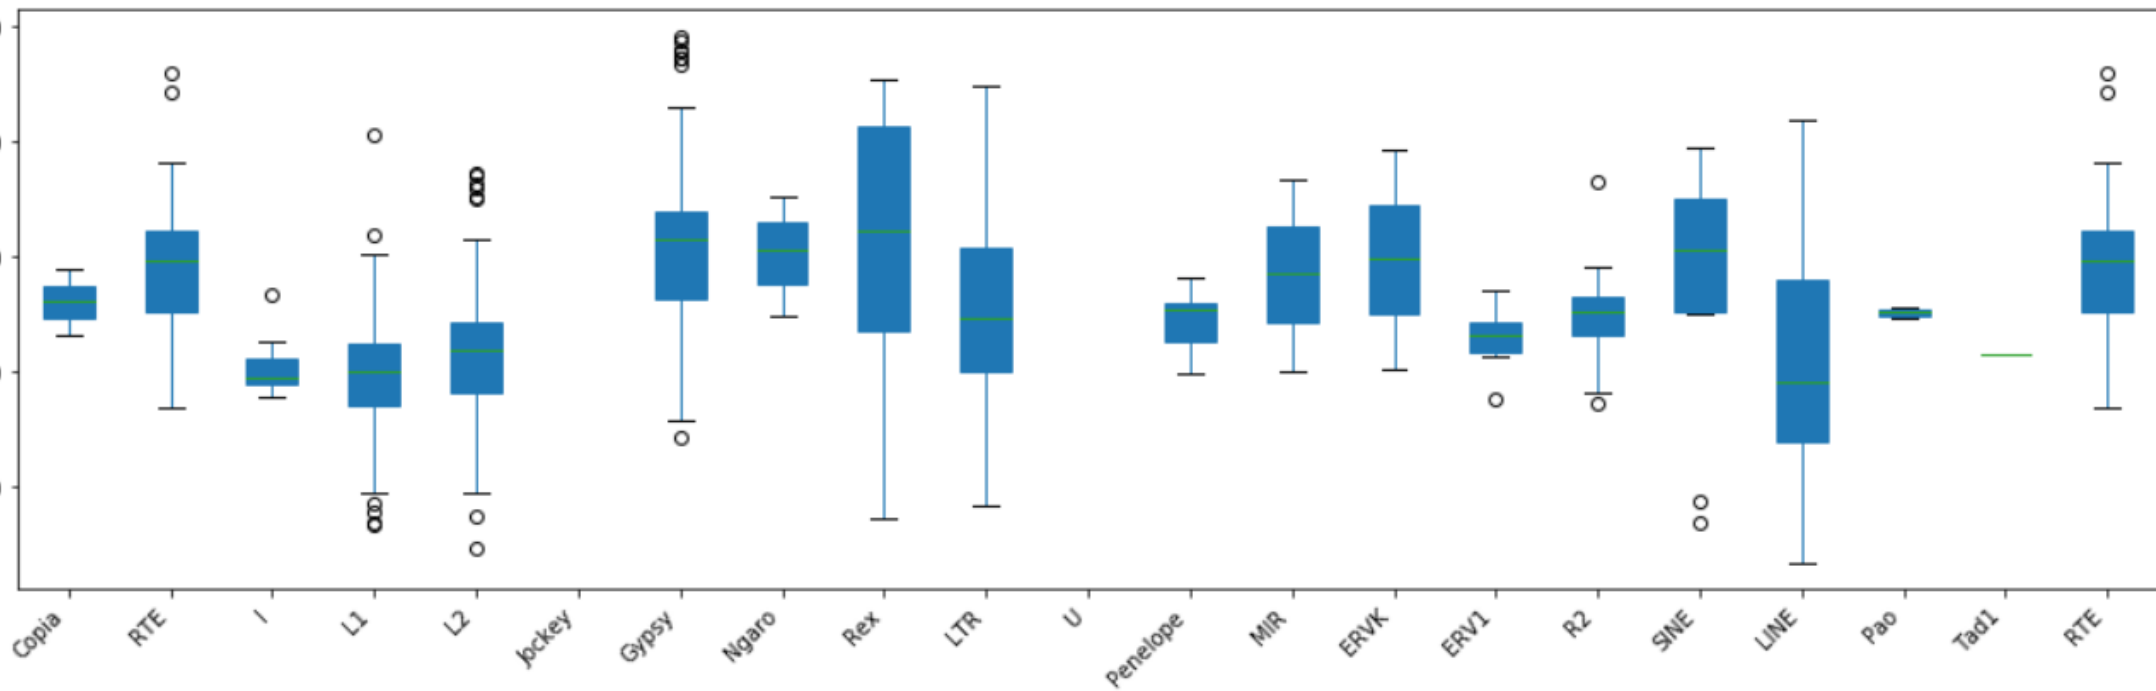

Class II

GC%

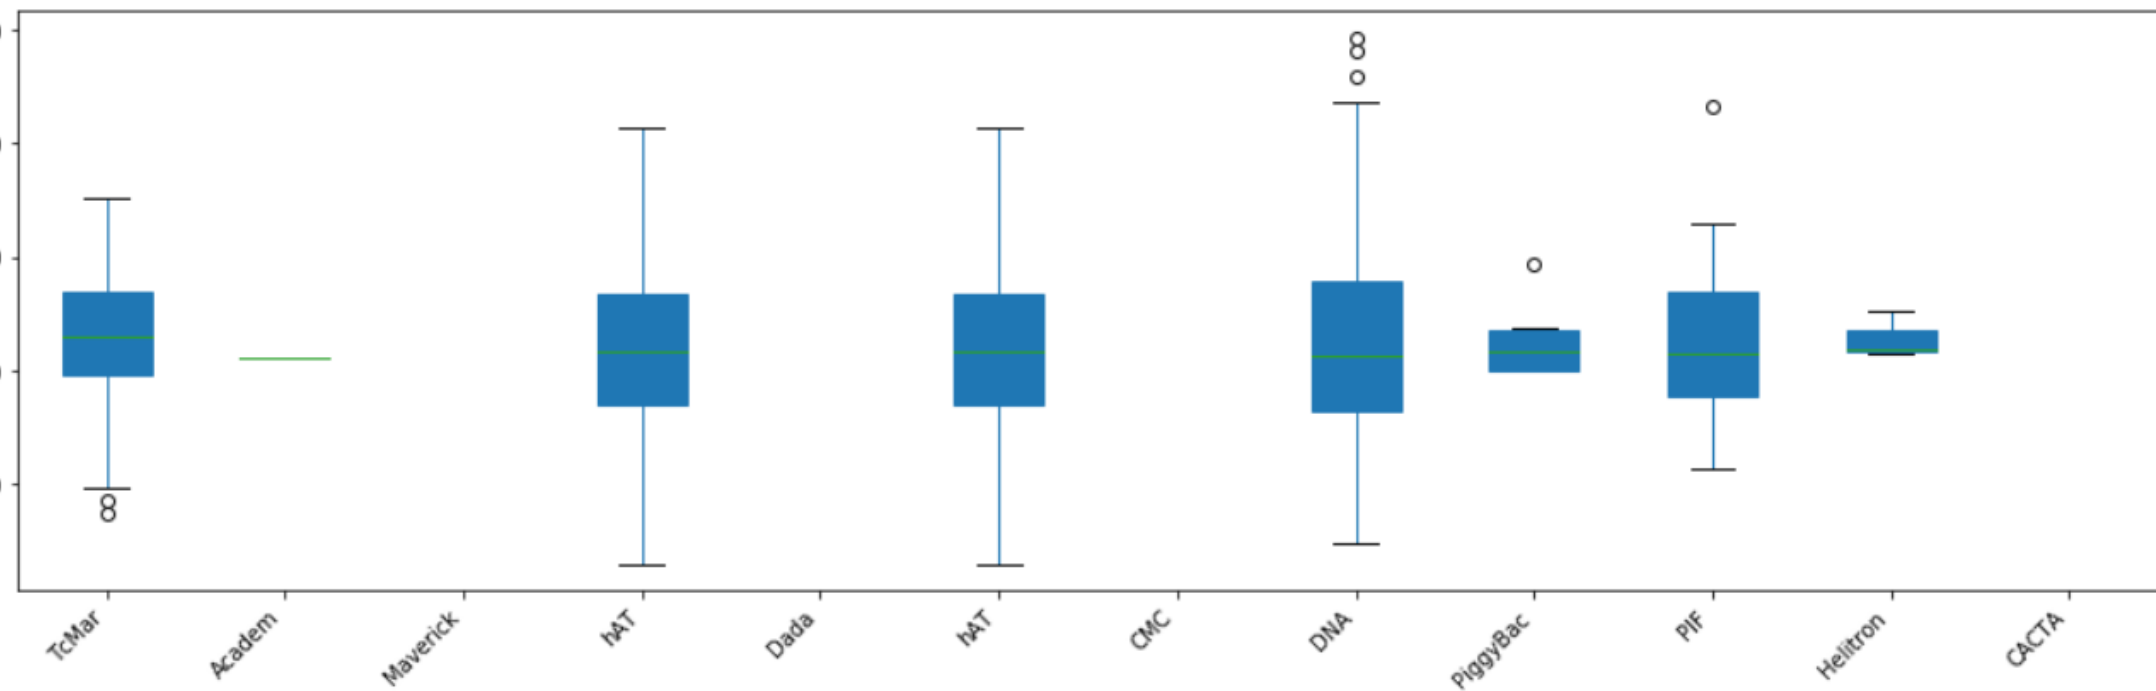

*Scleropages formosus*

GC<sub>G</sub> = 43,9%

**Class I**

GC%

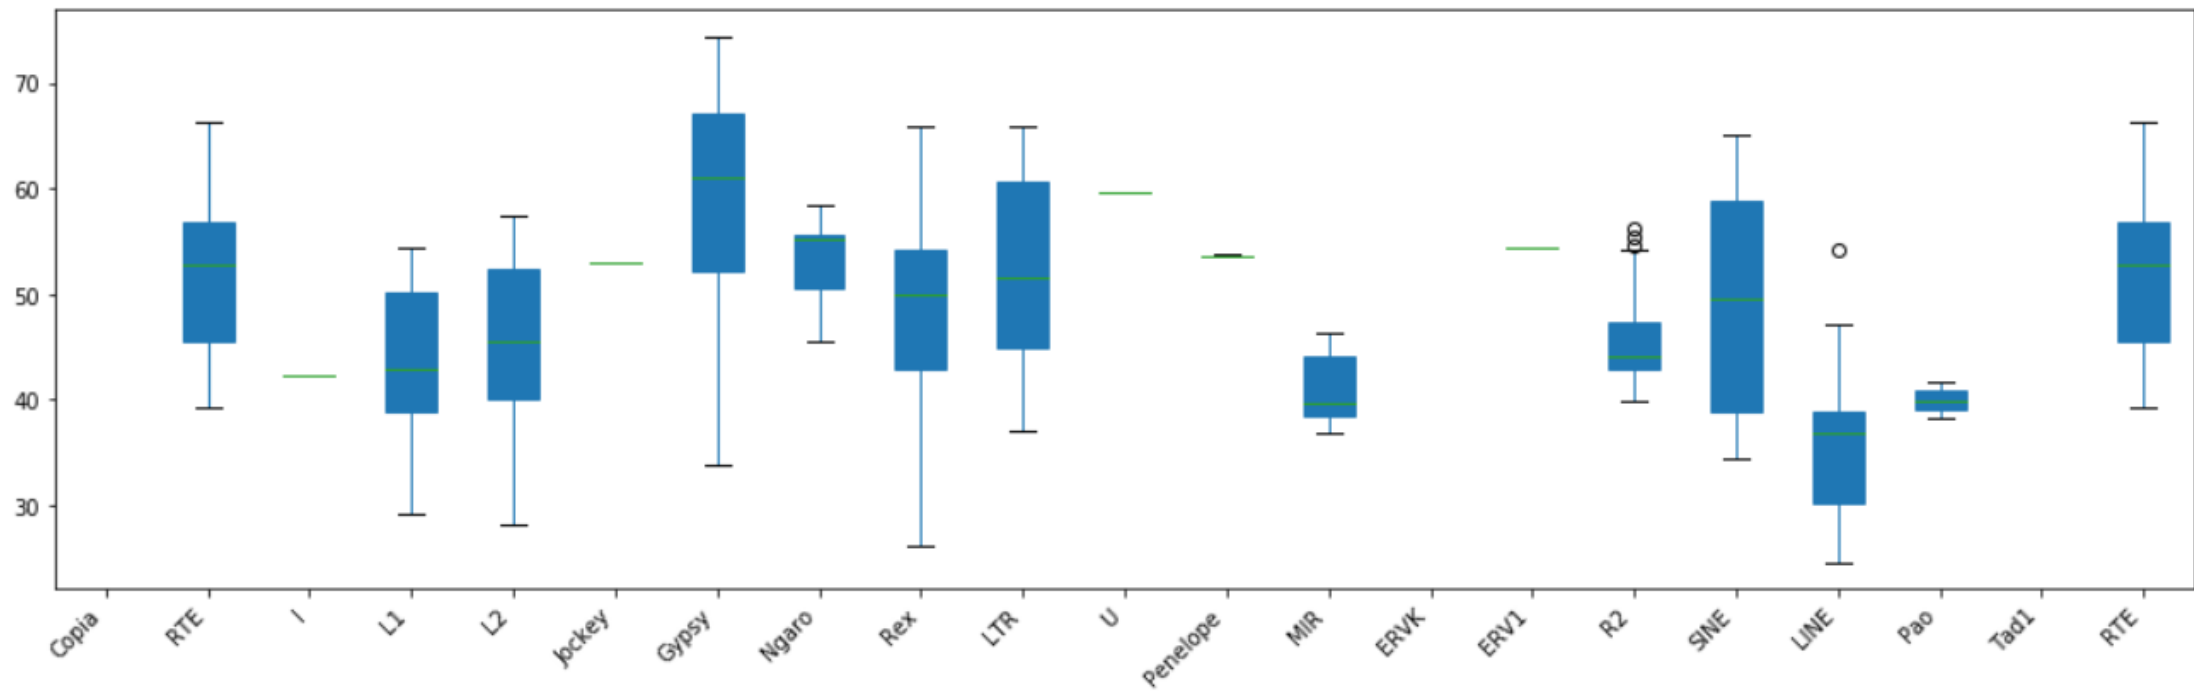

**Class II**

GC%

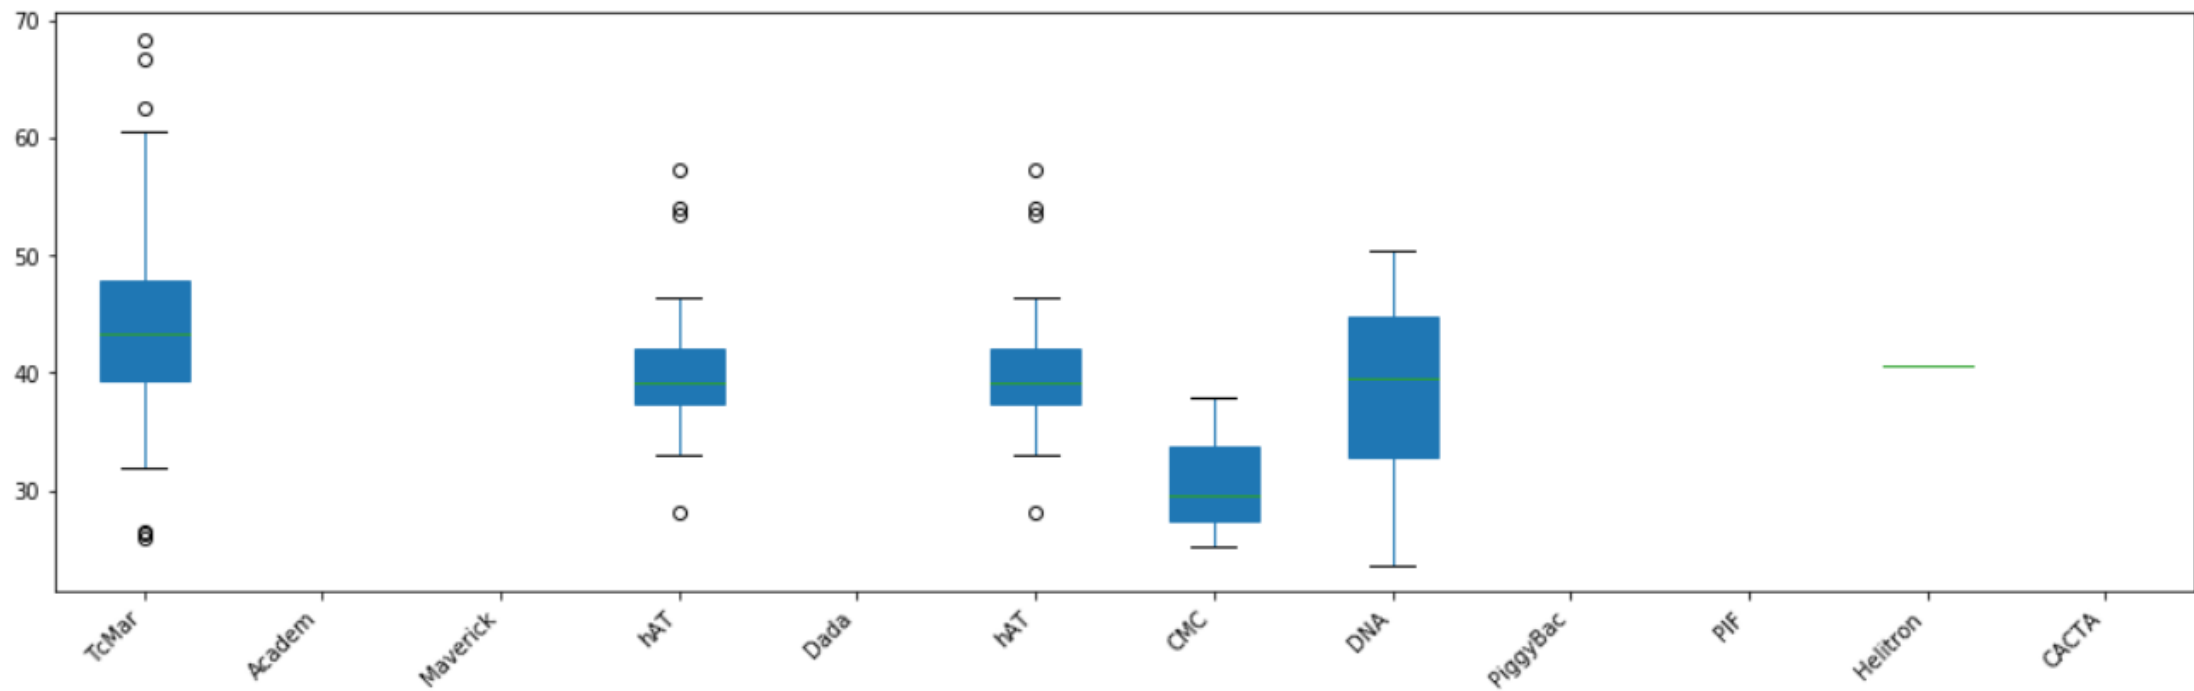



*Poecilia formosa*

GC<sub>G</sub> = 39,6%

**Class I**

GC%

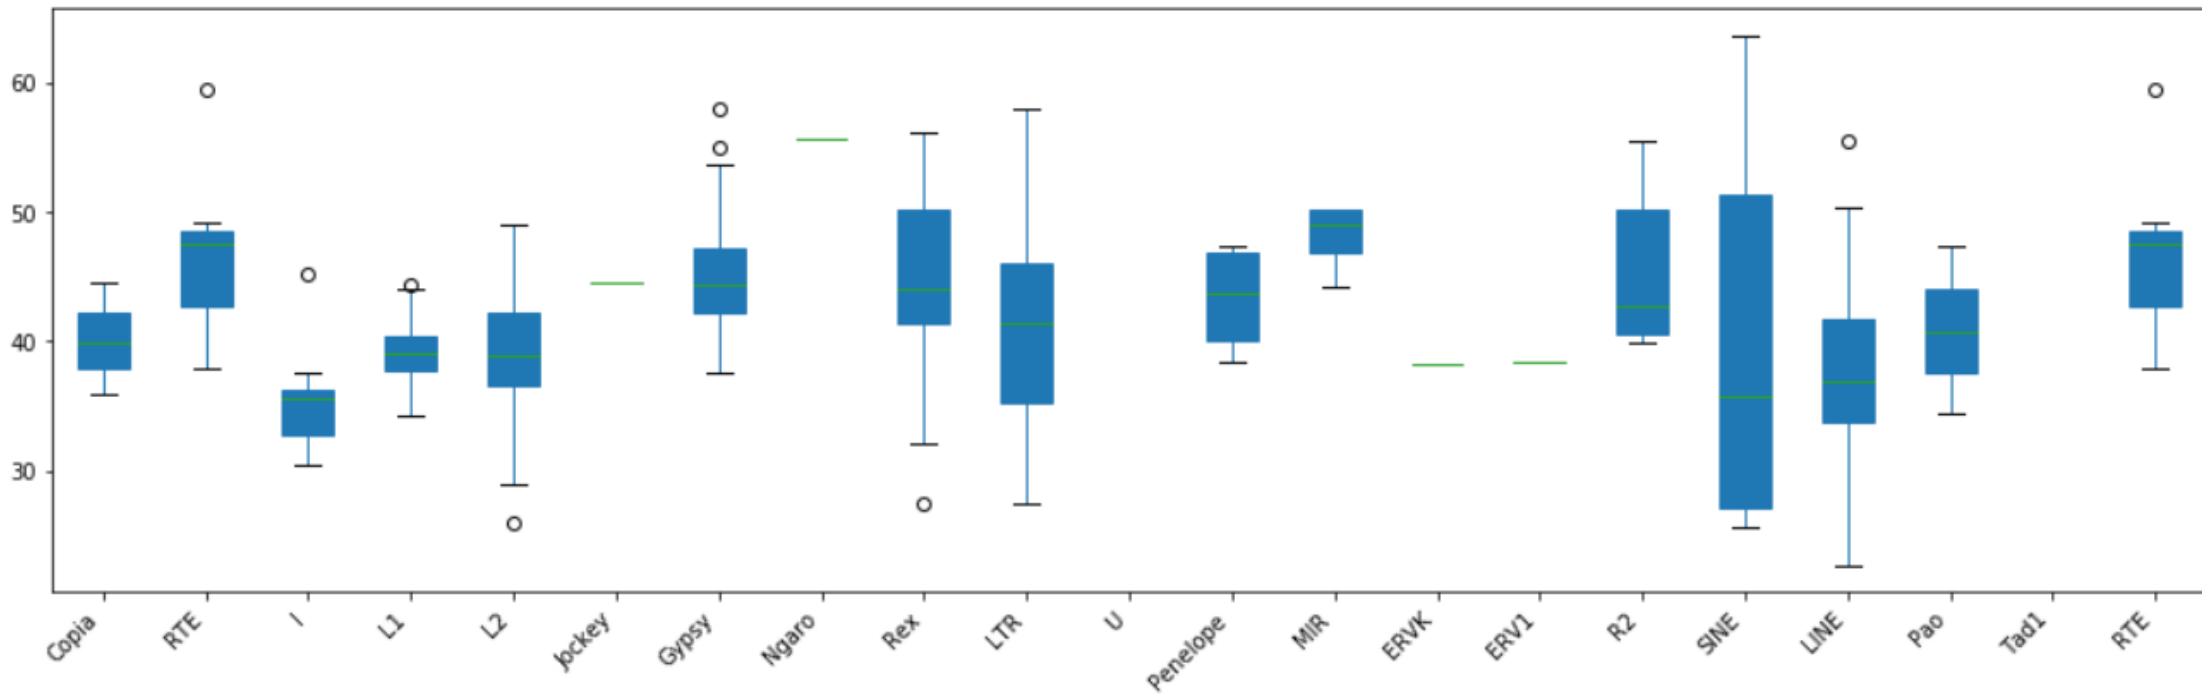

**Class II**

GC%

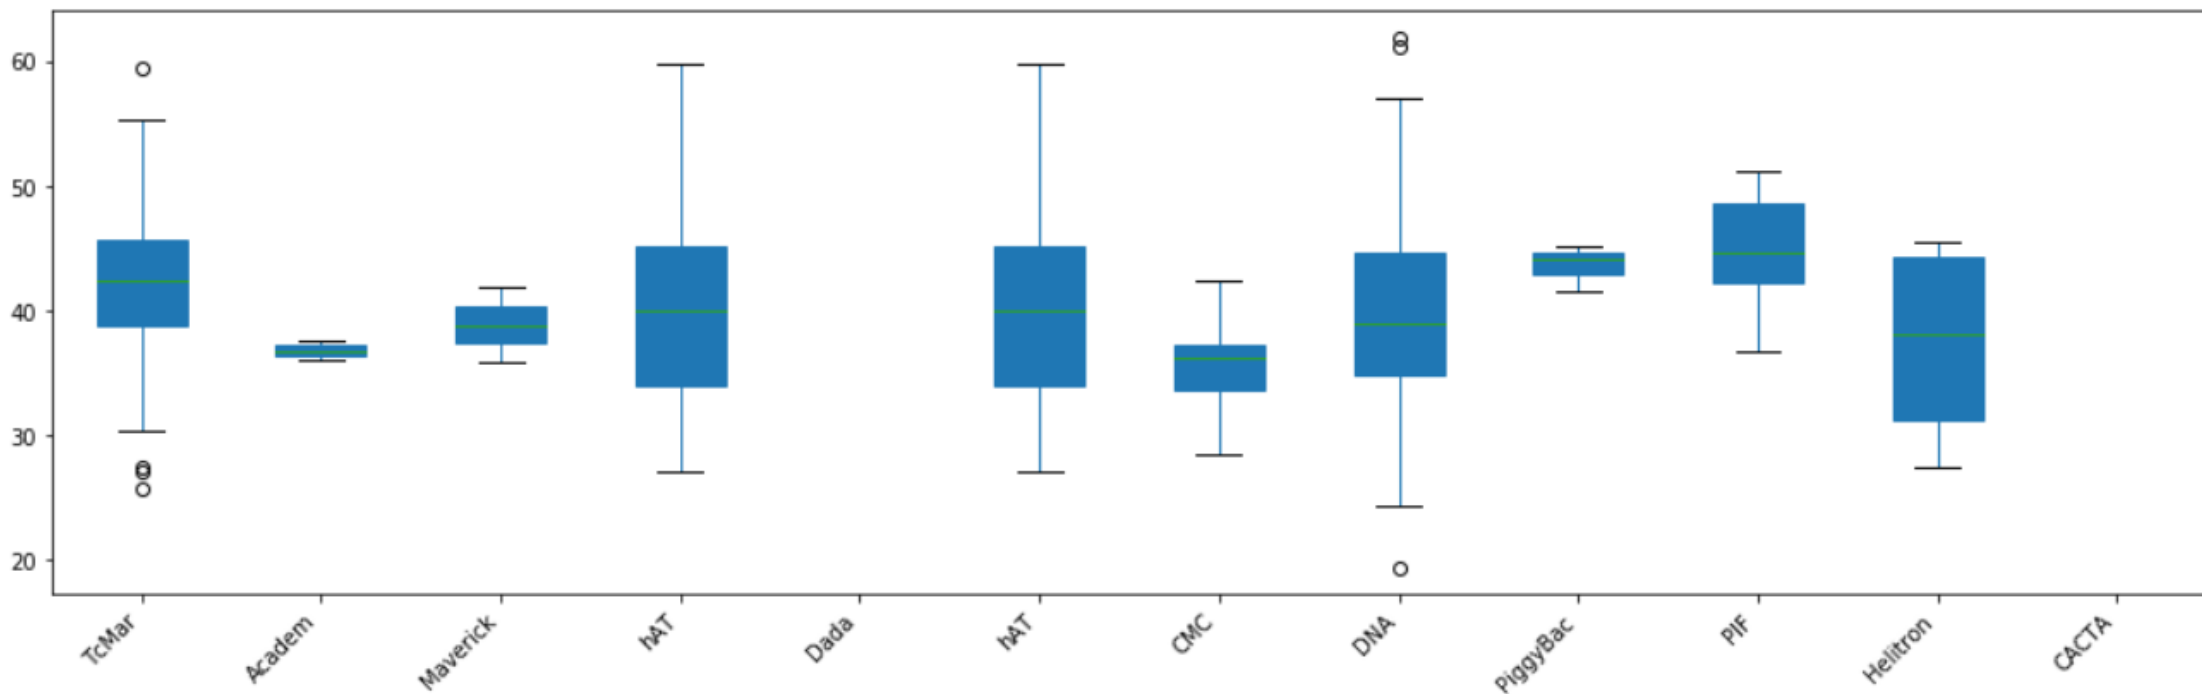

*Branchiostoma  
belcheri*

GC<sub>G</sub> = 40,6%

**Class I**

GC%

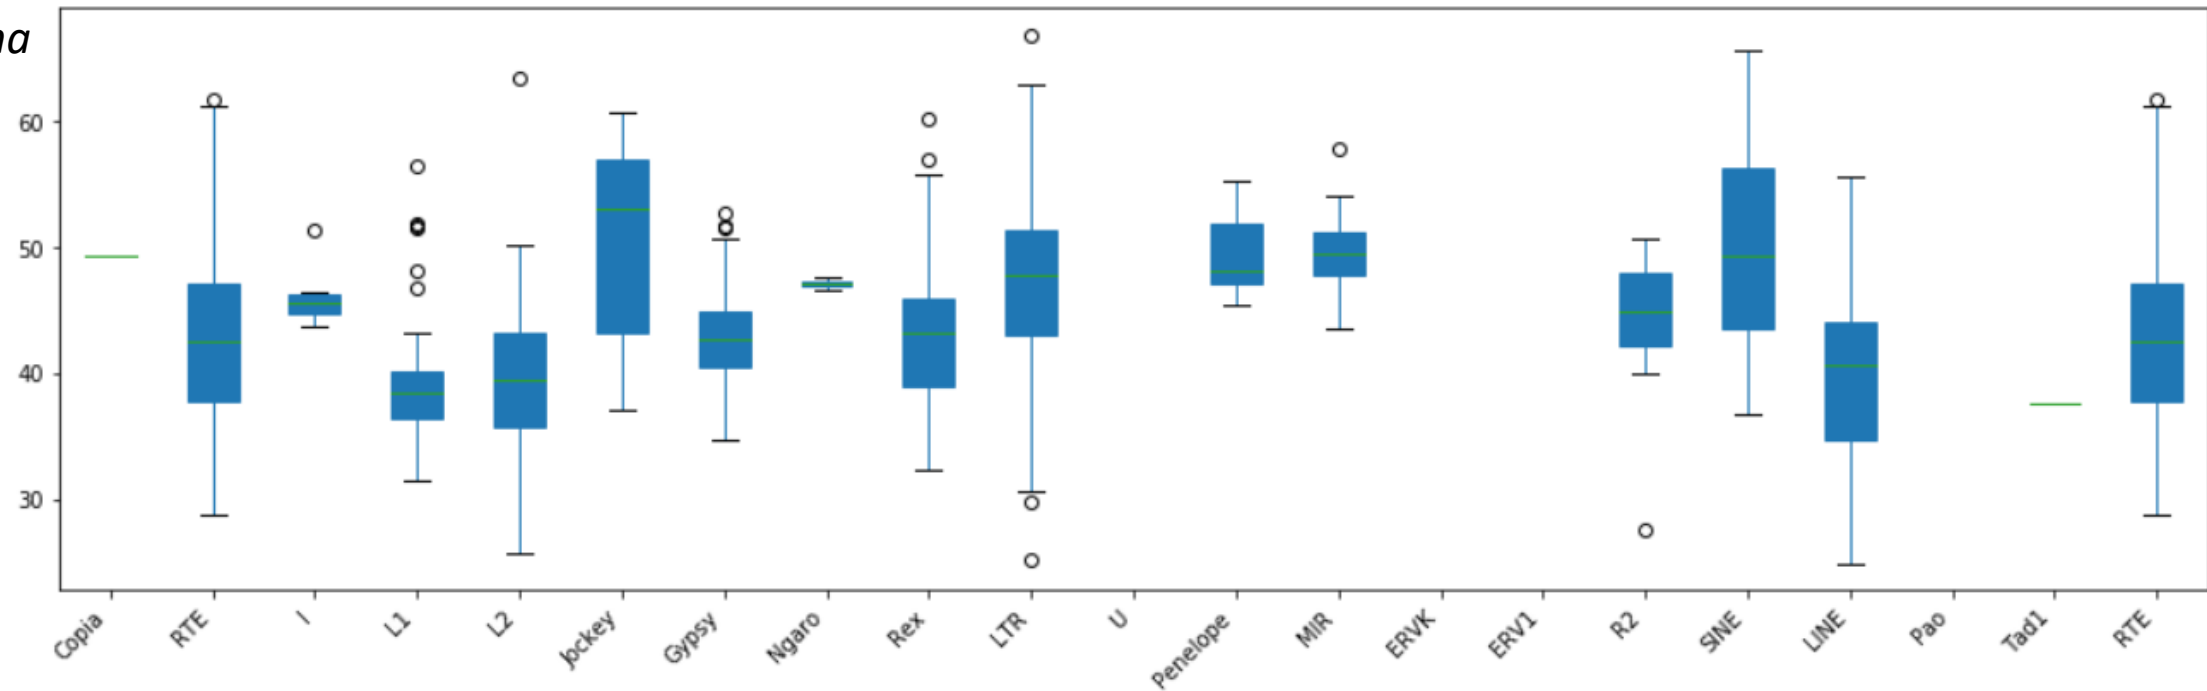

**Class II**

GC%

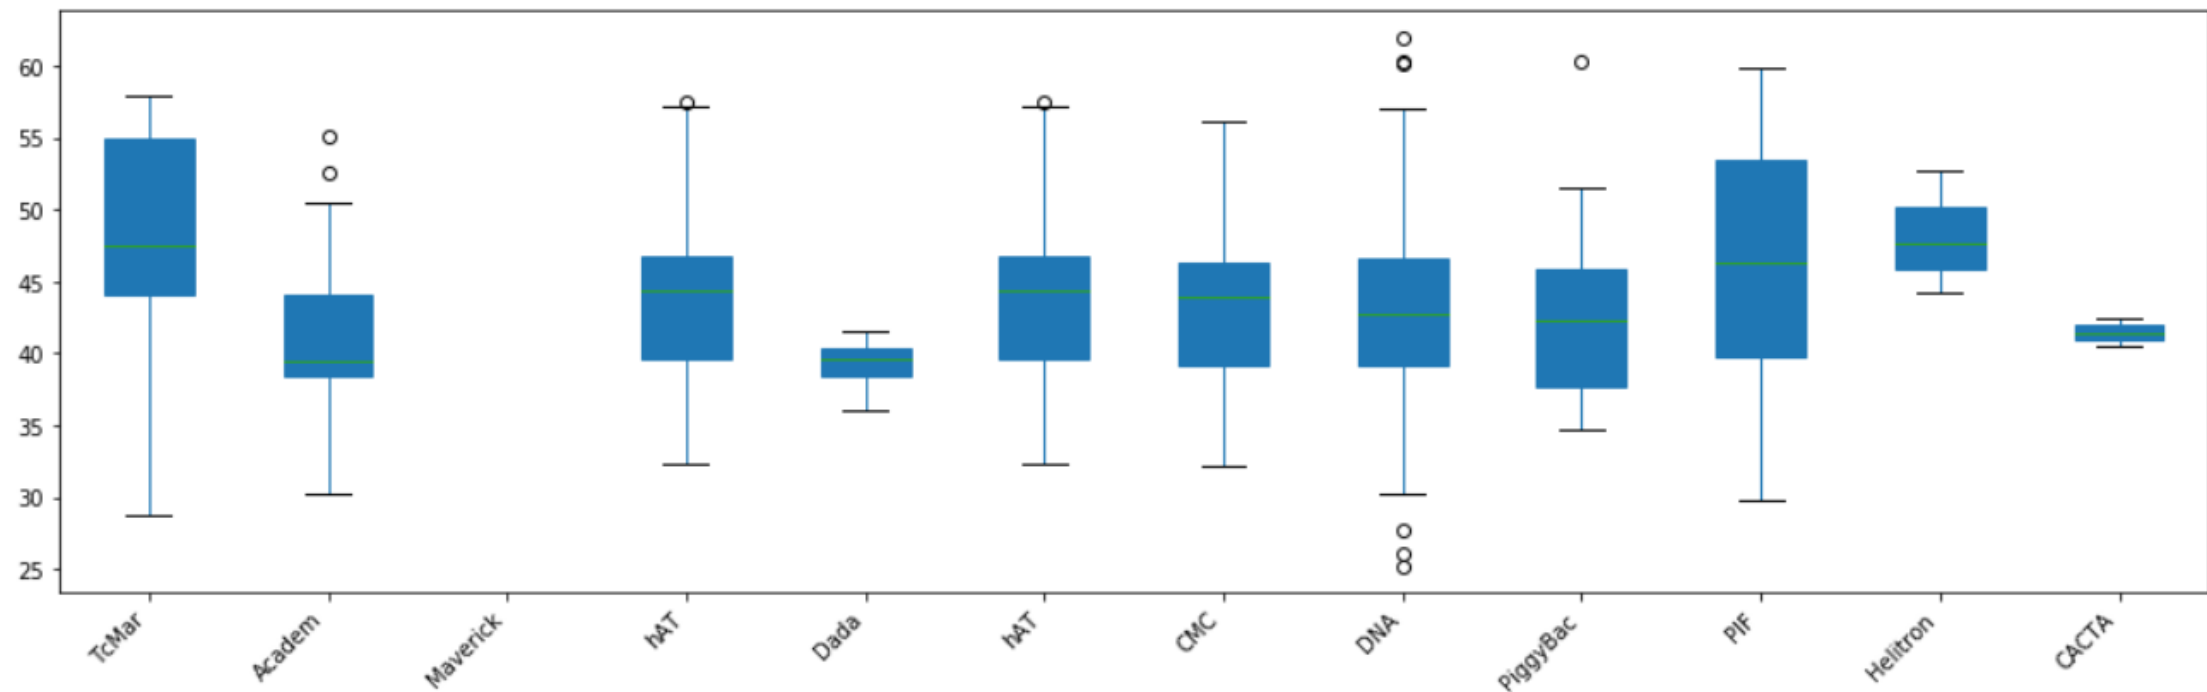

*Petromyzon marinus*

GC<sub>G</sub> = 45,6%

**Class I**

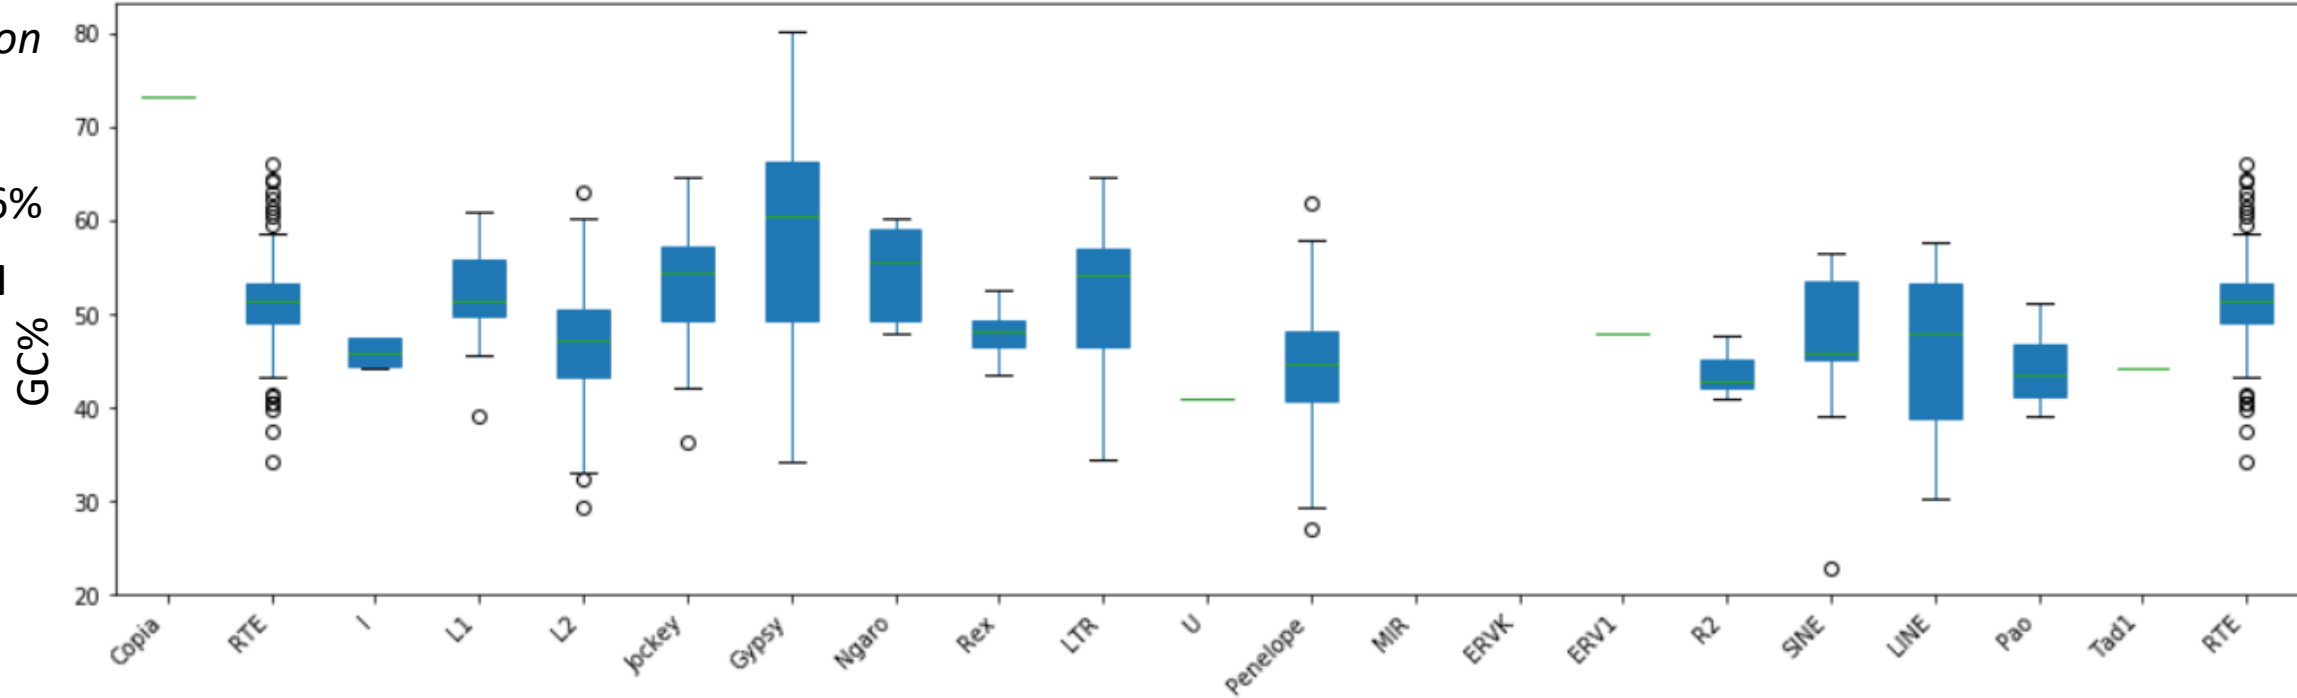

**Class II**

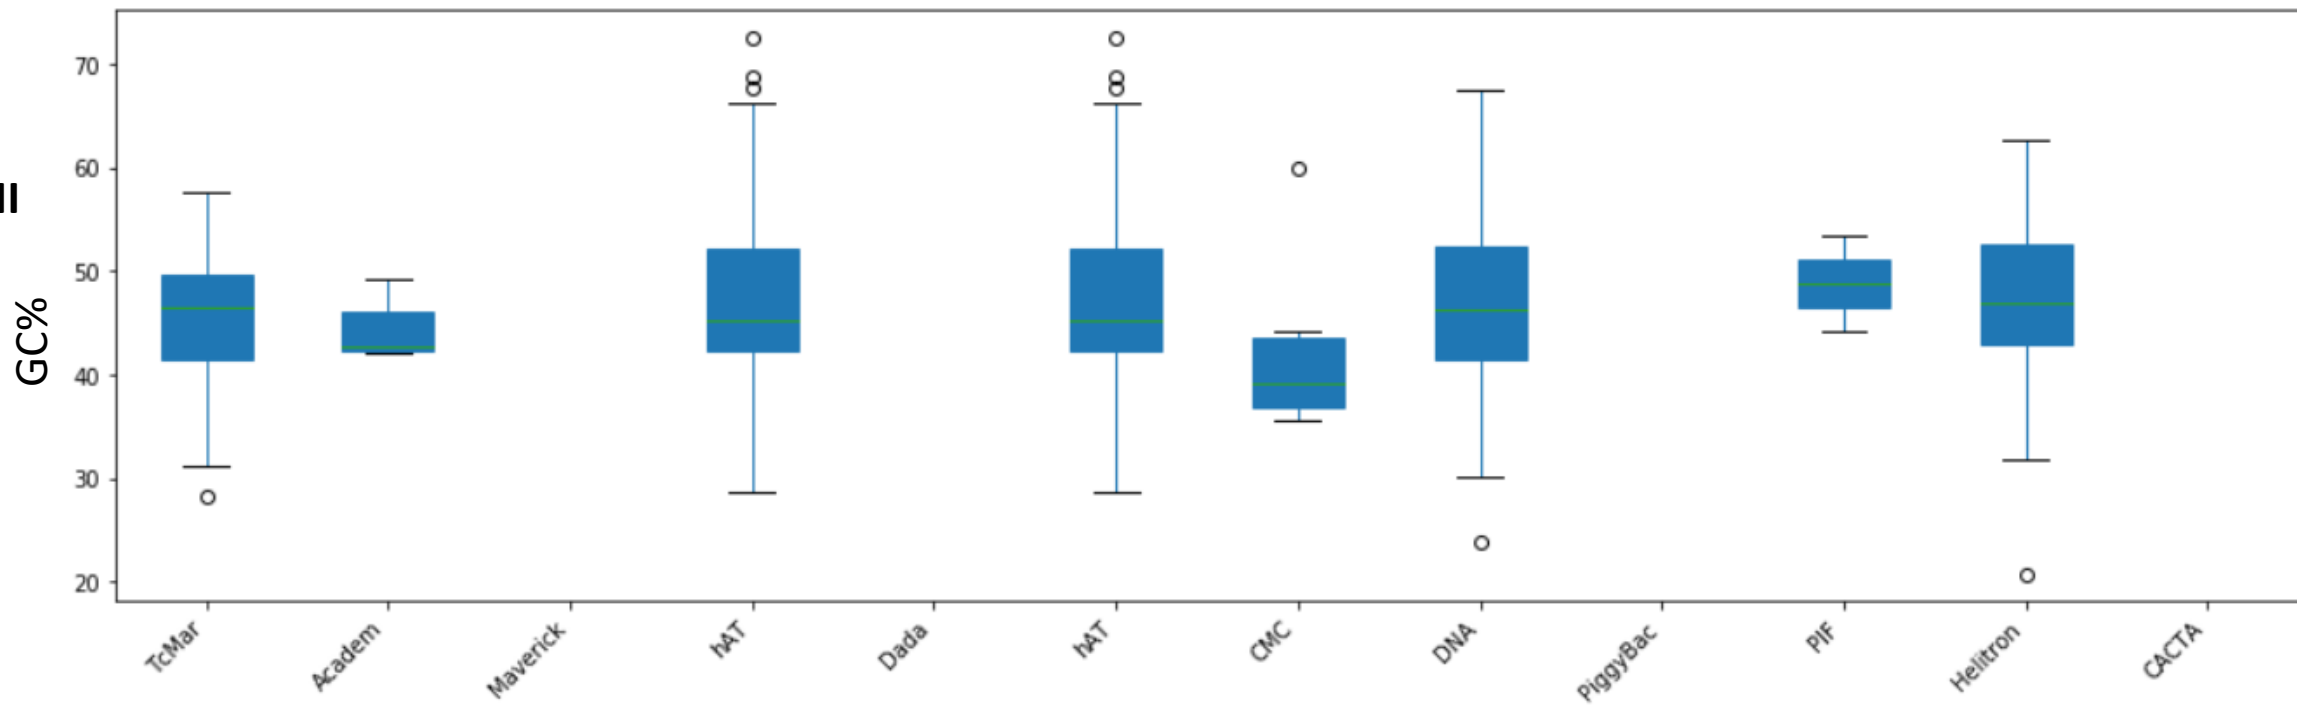

*Callorhinchus  
mili*

$GC_G = 42,6\%$

**Class I**

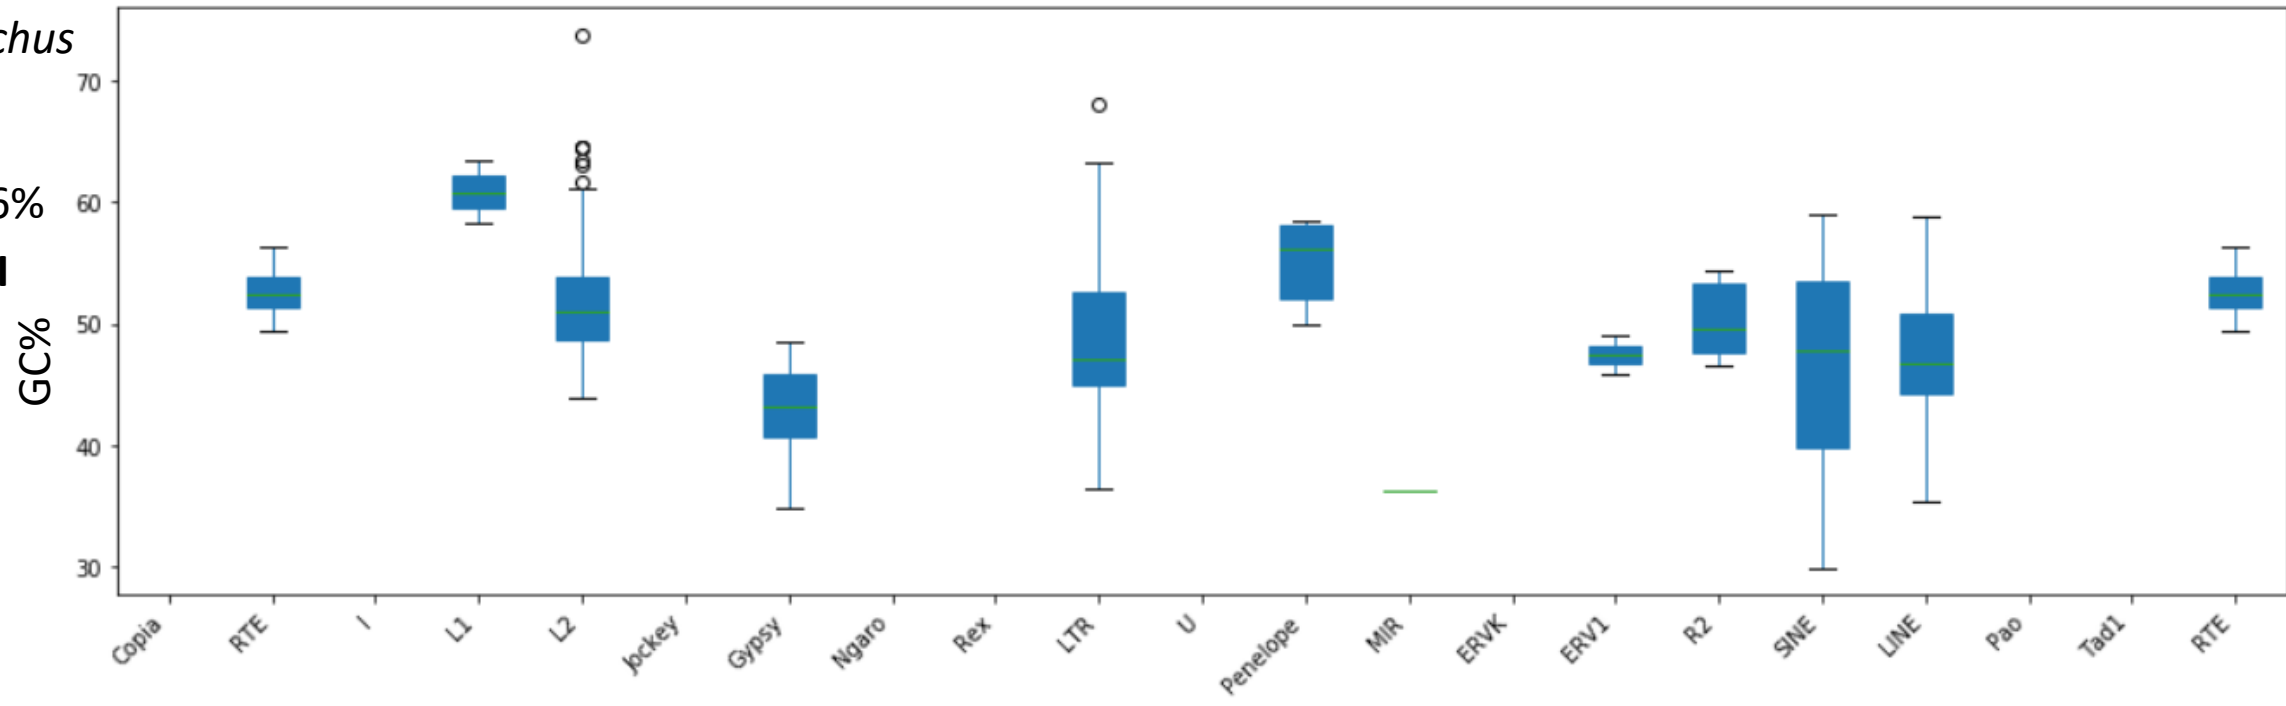

**Class II**

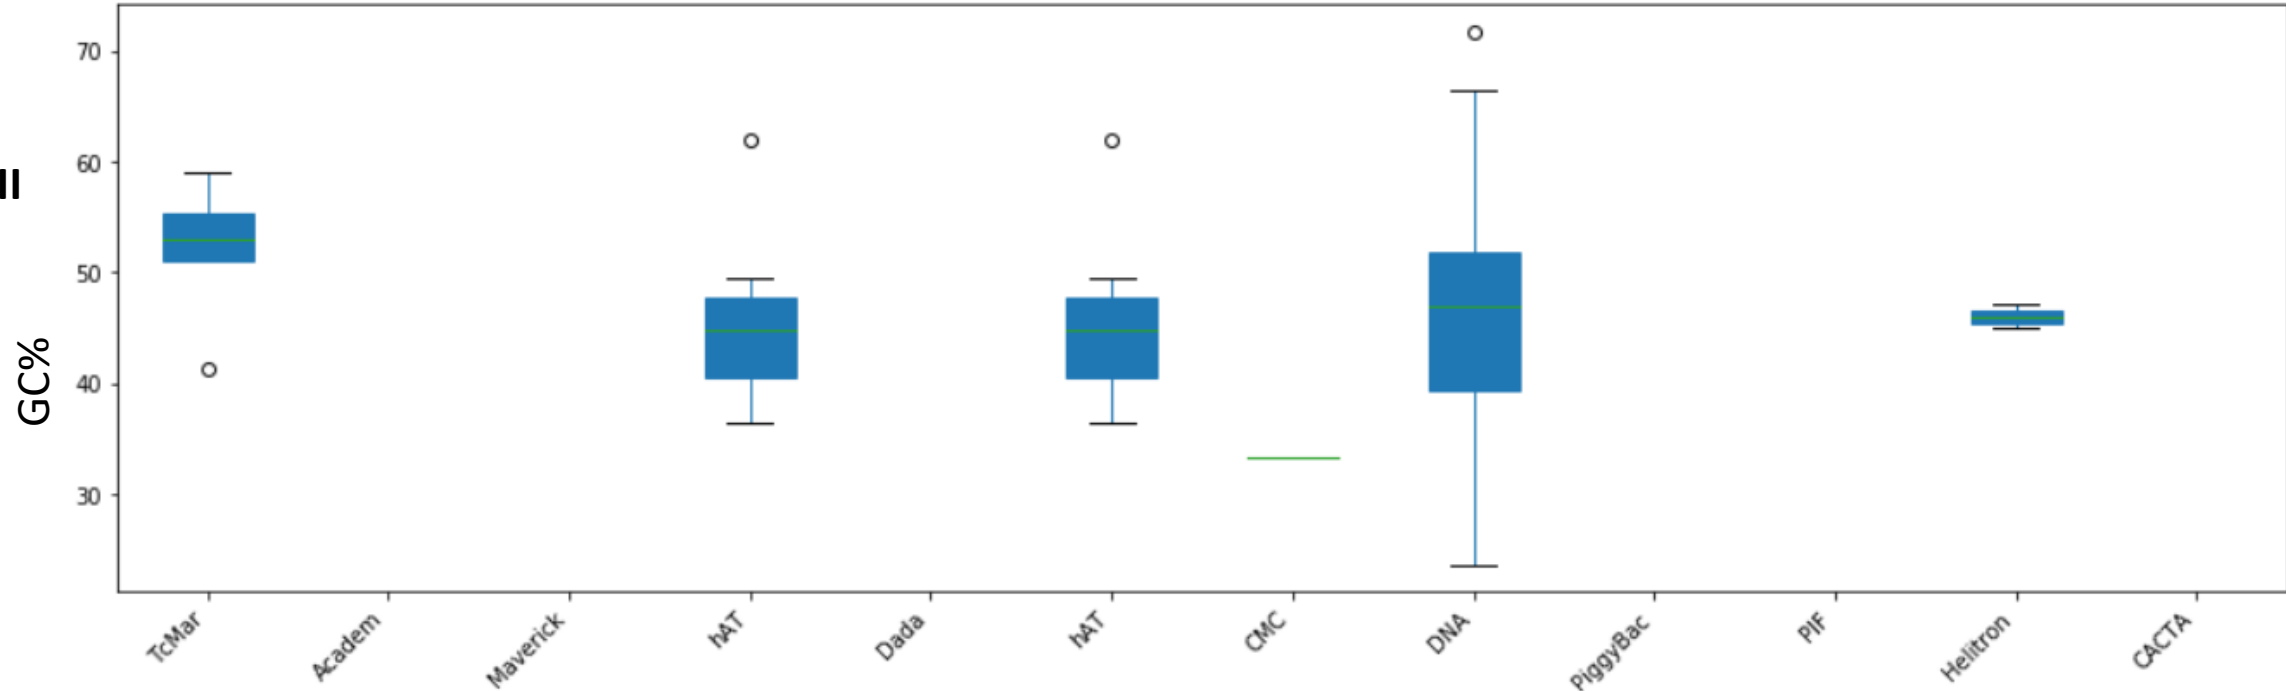

Supplement: 13100_2019_195_MOESM5_ESM.pdf [file 13100_2019_195_MOESM5_ESM.pdf]
